# Supplementary material for: Providing Food and Nutrition Services during the COVID-19 Surge at the Javits New York Medical Station
Source: MDPI journal article supplement (doi:10.3390/ijerph18147430), 2021-07-12

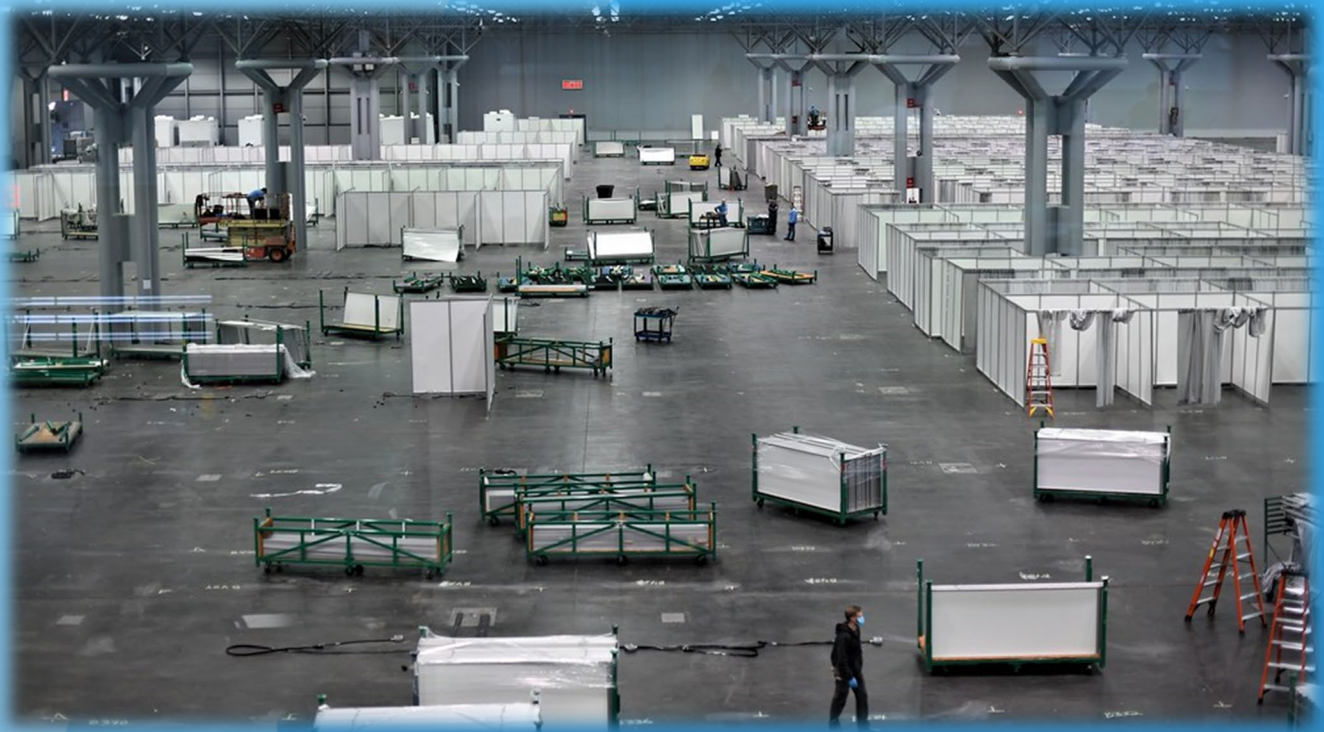

# Nutrition Response Toolkit for Humanitarian Crises

*June 2021*

*Tufts Initiative for the  
Forecasting and Modeling of  
Infectious Diseases*

The Tufts Initiative for the Forecasting and Modeling of Infectious Diseases (InForMID) was established to conduct research and provide a venue for training in the fields of computational epidemiology, conservation medicine, biostatistics, and bioinformatics with an emphasis on public health applications. The mission of InForMID is to improve the quality of biomedical research and health care by developing innovative analytical and computational tools and systems for life-science researchers, public health professionals, and policy makers.

To ensure the widest viewership of its research publications, guidelines, and toolkits, InForMID shares its works on <https://sites.tufts.edu/naumovalabs/> and <https://informid.tufts.edu/>. This public dissemination of knowledge, information, and resources allows for students, researchers, and public health professionals to foster new ideas and disseminate research in public health disciplines as quickly as possible.

### **General Disclaimer**

This publication was made possible through support provided by Friedman School of Nutrition Science and Policy, Tufts University. The views represented in this article are solely those of the authors and do not represent the views of the United States Government, the Department of Defense, or the U.S. Army. Additionally, this document does not represent endorsement of any organization or association by the authors or any United States Government agency. All photographs were extracted from publicly available sources with creative common licenses.

### **Suggested Citation**

Sanchez, E.; Gelfand, A.R.; Perkins, M.D.; Tarnas, M.C.; Simpson, R.B.; McGee, J.A.; Naumova, E.N. *Nutrition Response Toolkit for Humanitarian Crises*; Tufts Initiative for the Forecasting and Modeling of Infectious Diseases: Gerald J. and Dorothy R. Friedman School of Nutrition Science and Policy, Tufts University, 2021; <https://sites.tufts.edu/naumovalabs/crisisnutritiontoolkit/>.

### **Contact For Further Information**

Dr. Elena Naumova, Chair of the Division of Nutrition Epidemiology and Data Sciences, Gerald J. and Dorothy R. Friedman School of Nutrition Science and Policy,  
Tufts University; 150 Harrison Avenue, Boston, Massachusetts, USA, 02111  
Email: [Elena.Naumova@tufts.edu](mailto:Elena.Naumova@tufts.edu)  
Telephone: +1 617-636-3737

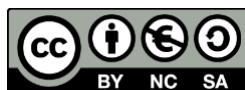

Unless otherwise noted, the content in this toolkit is licensed under a CC BY-NC-SA 4.0.

© InForMid – All rights reserved

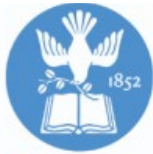

**Tufts**  
UNIVERSITY

Gerald J. and Dorothy R.  
Friedman School of  
Nutrition Science and Policy

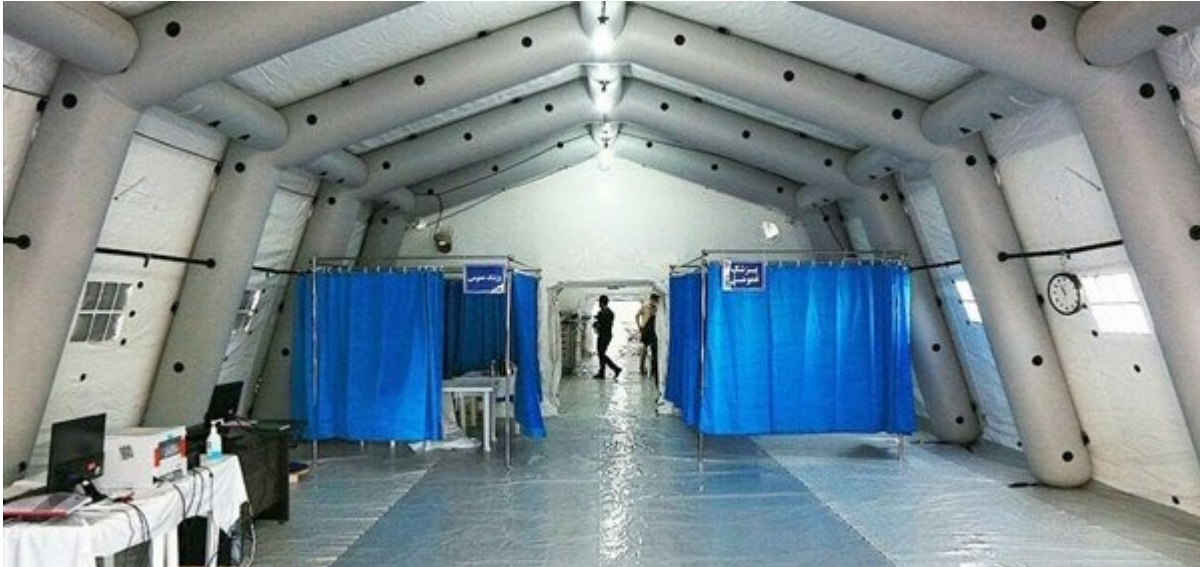

## Executive Summary

The Nutrition Response Toolkit for Humanitarian Crises is designed to provide standardized, low-cost, easily adaptable crisis nutrition operational protocols for implementation in future field hospital deployments. In many humanitarian crises, field hospitals lack sufficient medical supplies and personnel to properly prepare, provide, and sustain food services and clinical nutrition assessments. Furthermore, nutrition personnel may lack the training or guidance on how to coordinate food services or conduct rapid clinical nutrition assessments. These challenges necessitate the creation of a standardized nutrition emergency response toolkit that can provide Registered Dietitians (RDs) and other nutrition personnel with:

1. Staffing models and training recommendations for field environments;
2. Record-keeping systems to monitor nutrition status, allergies, and dietary needs;
3. Food delivery trackers and meal forecasting calculators;
4. Therapeutic meals and menu options with limited food supplies; and
5. Easily administered malnutrition screening assessments.

This toolkit is designed to be adaptable to a variety of emergency settings with or without an operational electronic medical record (EMR) system. That said, this toolkit is intended to expand over time to incorporate new protocol templates based on experiences faced by other nutrition personnel in emergency settings. As such, these tools should be considered templates that can be adapted for the nutrition personnel's or clinician's needs to best reconcile medical and nutrition records, harmonize patient information, and improve the continuity of care between medical and nutrition branches. We encourage those using this resource to collaborate with authors to expand this toolkit and help to improve this resource as preparedness planning tool for crisis nutrition personnel in future field hospital or humanitarian crisis settings.

## Table of Contents

|                                                                        |           |
|------------------------------------------------------------------------|-----------|
| <b>Introduction.....</b>                                               | <b>6</b>  |
| <b>2. Establishing a Field Hospital Nutrition Operations Team.....</b> | <b>7</b>  |
| 2.1. <i>Overview.....</i>                                              | 7         |
| 2.2. <i>Staffing model for emergency settings .....</i>                | 7         |
| 2.3. <i>Two-day staffer training program.....</i>                      | 11        |
| <b>3. Monitoring Inpatient Nutrition Status.....</b>                   | <b>14</b> |
| 3.1. <i>Overview.....</i>                                              | 14        |
| 3.2. <i>Screeners for inpatient nutrition status .....</i>             | 14        |
| 3.3. <i>Modified ADIME note .....</i>                                  | 15        |
| 3.4. <i>Tracker for patient census and diet orders .....</i>           | 17        |
| 3.5. <i>Diet roster.....</i>                                           | 19        |
| <b>4. Receiving Nutrition Concerns from Field Hospital Staff .....</b> | <b>21</b> |
| 4.1. <i>Overview.....</i>                                              | 21        |
| 4.2. <i>Nutrition consultation form.....</i>                           | 21        |
| 4.3. <i>Diet order change and supplement request form .....</i>        | 22        |
| 4.4. <i>Food temperature log .....</i>                                 | 23        |
| <b>5. Calculating Patient Nutrition Support Needs .....</b>            | <b>25</b> |
| 5.1. <i>Overview.....</i>                                              | 25        |
| 5.2. <i>Guide for enteral formulary .....</i>                          | 25        |
| 5.3. <i>Enteral nutrition recommendation calculator .....</i>          | 26        |
| <b>Future Directions.....</b>                                          | <b>29</b> |
| <b>Authors and Acknowledgements.....</b>                               | <b>29</b> |
| <b>References.....</b>                                                 | <b>30</b> |
| <b>Appendices.....</b>                                                 | <b>32</b> |

## Glossary

| Term                                       | Operational Definition                                                                                                                                                                                                                                                                                                     |
|--------------------------------------------|----------------------------------------------------------------------------------------------------------------------------------------------------------------------------------------------------------------------------------------------------------------------------------------------------------------------------|
| Combat Support Hospitals & Field Hospitals | Mobile, deployable hospitals housed in tents and expandable containers that provide surgical and trauma close to combat action                                                                                                                                                                                             |
| Malnutrition                               | An acute, subacute or chronic state of nutrition in which a combination of varying degrees of overnutrition or undernutrition with or without inflammatory activity have led to a change in body composition and diminished function [1,2].                                                                                |
| Medical Nutrition Therapy                  | “An evidenced-based application of the Nutrition Care Process that includes a nutrition assessment/reassessment, nutrition diagnosis, nutrition intervention and nutrition monitoring and evaluation that typically results in the prevention, delay or management of diseases and/or conditions [3].”                     |
| Nutrition Support                          | The provision of enteral or parenteral nutrients to treat or prevent malnutrition. Nutrition Support Therapy is part of Nutrition Therapy, which is a component of medical treatment that can include oral, enteral, and parenteral nutrition to maintain or restore optimal nutrition status and health [4].              |
| Enteral Nutrition                          | Enteral nutrition is another way people can receive the nutrition they need. Also called "tube feeding," enteral nutrition is a mixture of all the needed nutrients. It is thicker than parenteral nutrition and sometimes it looks like a milk shake. It is given through a tube into the stomach or small intestine [4]. |



## Introduction

During the novel coronavirus disease 19 (COVID-19) pandemic, countries worldwide have developed temporary medical facilities to provide sufficient testing and care to infected persons [5–9]. An extension of combat support hospitals and field hospitals, these facilities commonly provide emergency medical services during military deployment [10,11]. However, in recent years many countries have begun deploying these temporary hospitals to provide emergency services and supplies during natural disasters and humanitarian emergencies [12,13].

Throughout the COVID-19 pandemic, these facilities have faced growing volumes of infected persons and have lacked sufficient personnel, medical supplies, medical equipment, and bed capacity to effectively house and treat patients. Safety concerns for medical personnel have also inhibited the delivery of care by reducing patient interaction, wearing personal protective equipment, and performing medical assessments while practicing social distancing [14]. These challenges especially inhibit medical staff providing nutrition services where patient interaction is consistently needed to monitor nutrition status and deliver therapeutic meals multiple times per day during a patient's hospital stay [14]. Furthermore, these nutrition operations require careful coordination and management of food contracts and supplies, which must be consistently monitored to ensure accessibility of patient meals and continuity of food safety, respectively.

In review of the Accreditation Council for Education in Nutrition and Dietetics' *Accreditation Standards for Nutrition and Dietetics Internship Programs*, under 'Domain 4. Practice Management and Use of Resources: Strategic application of principles of management and systems in the provision of services to individuals and organizations,' training competencies lack mention of food contracts or the development of skills necessary to implement and sustain food contracts, which are becoming vital skills in response to COVID-19 [15]. Furthermore, these resources fail to provide sufficient training on managing food contracts, staffing nutrition personnel, recording patient nutrition status, or administering nutrition assessments in emergency or disaster relief efforts. Without these resources, nutrition personnel cannot sufficiently prepare for field hospital deployments and must modify existing nutrition assessments that are not designed for resource sparse settings. These challenges necessitate a central technical report created to inform nutrition protocols and assessments in emergency response settings for clinical nutritionists, dietitians, and personnel.

To promote preparedness plans for nutrition response in future humanitarian crises, we develop this Nutrition Response Toolkit for Humanitarian Crises to provide a standardize nutrition-focused protocols for implementation in future field hospital deployments or humanitarian emergency facilities. For each proposed tool, we explain that tool's purpose and utilization, provide an example of how to implement this tool in the field, and provide a fillable form for use in crisis settings.

## 2. Establishing a Field Hospital Nutrition Operations Team

### 2.1. Overview

When planning for a potential use of a field hospital, one must remember that field hospitals are modular medical treatment facilities generally designed to provide medical capabilities in a deployed setting [11]. Within the field hospital, it is the responsibility of nutrition care operations, which primarily consists of Registered Dietitians (RDs) and Nutrition Dietetics Technicians, Registered (NDTR), to provide services that include meal preparation and service to patients, medical nutrition therapy, dietetic planning and patient education [16]. Hospital food service and clinical nutrition operations are essential to ensure patients receive sufficient nutrition to prevent complications associated with malnutrition, while complying with the appropriate diet orders given their medical diagnosis [16]. Yet in the wake of a humanitarian crisis, no single staffing model exists for nutrition response in field hospitals [17]. With that in mind, we provide examples of a staffing model and personnel training program that can assist in establishing nutrition services within an emergency field hospital or medical facility.

### 2.2. Staffing model for emergency settings

#### Purpose

The Field Hospital Staffing Model is designed to identify staffing needs for nutrition services in a field hospital or emergency facility setting with 125-500 patient beds. This model accommodates for extended time needed to complete patient assessments due to the absence of an EMR, donning and doffing full PPE, locating patients amid transfers, coordinating care with medical and nutritional personnel, documenting MNT recommendations, and balancing the completion of clinical and food service roles.

#### Utilization

This tool should be referenced during the planning phase of a field hospital mobilization. This model assumes that: i) nutrition operations are functional during a 12-hour period, e.g., 6:30 am – 6:30 pm, seven days per week; ii) the field hospital serves a patient census ranging from 125-500 patients per day; and iii) RDs have limited capacity (3-4 patients daily) to provide clinical care.

#### Example of Staffing Model

| Position                            | Shift | Working Hours     | FTE<br>(~125 beds) | FTE<br>(~250 beds) | FTE<br>(~375 beds) | FTE<br>(~500 beds) |
|-------------------------------------|-------|-------------------|--------------------|--------------------|--------------------|--------------------|
| Food Service Dietitian *            | AM    | 6:30 am – 2:30 pm | 1                  | 1                  | 2                  | 2                  |
| Food Service Dietitian *            | PM    | 11 am – 7 pm      | 1                  | 1                  | 1                  | 1                  |
| Clinical Floor Dietitian**          | Day   | 8 am – 4 pm       | 0                  | 1                  | 2                  | 5                  |
| Clinical Critical Care Dietitian*** | Day   | 8 am – 4 pm       | --                 | --                 | 1                  | 2                  |
| On-call Dietitian                   | PRN   | As needed         | 1                  | 1                  | 1                  | 2                  |

|                                                                                                                                                                                                                                                                                                                                                                                                                                                                                                                                                    |     |                             |   |   |    |    |
|----------------------------------------------------------------------------------------------------------------------------------------------------------------------------------------------------------------------------------------------------------------------------------------------------------------------------------------------------------------------------------------------------------------------------------------------------------------------------------------------------------------------------------------------------|-----|-----------------------------|---|---|----|----|
| Food Service and Clinical Nutrition Manager                                                                                                                                                                                                                                                                                                                                                                                                                                                                                                        | Day | 6 am – 6 pm                 | 1 | 1 | 1  | 1  |
| Nutrition and Dietetics Technicians, Registered (NDTR)                                                                                                                                                                                                                                                                                                                                                                                                                                                                                             | Day | 12 hours, with three breaks | 4 | 8 | 13 | 20 |
| <p>* At a census level of 125 beds, the AM and PM food service dietitians can function as the clinical floor dietitians for patient care and production.</p> <p>** A clinical floor dietitian is necessary at a census level of 250 beds to address nutrition consults and provide MNT to patients at risk for malnutrition who are receiving care in the ICU.</p> <p>*** At census level of 375 patient beds, critical care dietitians become necessary to support active and consistent engagement with ICU patients and their medical team.</p> |     |                             |   |   |    |    |

### Role Descriptions

1. **Food Service RDs** provide nutrition care to patients to prevent malnutrition and optimize recovery. Primary responsibilities include:
  - a. *AM Food Service RD:*
    - i. Assessing menus and diet orders to ensure food items are appropriate;
    - ii. Delivering meals safely at breakfast and lunch;
    - iii. Confirming patient census, diet orders and creating diet production sheets;
    - iv. Administering production sheets to NDTRs;
    - v. Supervising NDTRs preparing meal delivery carts;
    - vi. Overseeing diet order and food allergy questions/concerns;
    - vii. Answering questions regarding diet orders and assisting with appropriate food substitutions;
    - viii. Implementing and maintaining adherence to food safety and equipment sanitation protocols;
    - ix. Ensuring food waste is properly discarded after meal delivery service;
    - x. Checking floor nourishment par levels and confirming delivery of more stock items;
    - xi. At census levels of <125 patients: assessing patients identified as at risk for malnutrition and providing nutrition consultations; and
    - xii. At census levels of <250 patients: assisting clinical floor dietitians as needed.
  - b. *PM Food Service RD:*
    - i. Assessing menus and diet orders to ensure food items are appropriate;
    - ii. Delivering meals safely at dinner;
    - iii. Confirming patient census, diet orders and updating diet production sheets for dinner;
    - iv. Administering production sheets to NDTRs;
    - v. Supervising NDTRs preparing meal delivery carts;
    - vi. Overseeing diet order and food allergy questions/concerns;



- vii. Answering questions regarding diet orders and assisting with appropriate food substitutions;
- viii. Implementing and maintaining adherence to food safety and equipment sanitation protocols;
- ix. Ensuring food waste is properly discarded after meal delivery service;
- x. At census levels of <125 patients: assessing patients identified at risk for malnutrition and providing nutrition consultations; and
- xi. At census levels of <250 patients: assisting clinical floor dietitians as needed.

2. **Clinical RDs** provide nutrition care to patients to prevent malnutrition and optimize recovery. Primary responsibilities include:

a. *Clinical Floor RD:*

- i. Providing nutrition care and management of patients in a general medicine setting;
- ii. Interpreting physician diet orders and modifying patient diet according to diet patterns and patient preferences;
- iii. Conducting clinical nutrition assessments on patients identified at risk for malnutrition via the [Nutrition Screening Form](#) or the [Nutrition Consultation Form](#);
- iv. Providing MNT recommendations (i.e., chronic disease management and strategies to improve food intake during hospital admission);
- v. Making appropriate recommendations for nutrition care including but not limited to:
  - 1. Oral supplements
  - 2. Nutrition supplements
  - 3. Food-drug interactions
- vi. Communicating nutrition recommendations through appropriate medical documentation using the ADIME format;
- vii. Completing calorie counts;
- viii. Attending medical rounds and patient care plan meetings;
- ix. Coordinating care with patient's primary care manager (PCM) and case management;
- x. Communicating nutrition recommendations for assigned patients to food service staff; and
- xi. Maintaining open communication between the hospital staff and Nutrition Operations.

b. *Clinical Critical Care RD:*

- i. Conducting nutrition assessments on patients in the ICU;
- ii. Interpreting physician diet orders and modifying patient diet according to diet patterns and patient preferences;

- iii. Conducting clinical nutrition assessments on patients identified at risk for malnutrition via the [Nutrition Screening Form](#) or the [Nutrition Consultation Form](#);
  - iv. Providing medical nutrition therapy recommendations including but not limited to:
    - 1. Enteral nutrition support
    - 2. Parenteral nutrition support
    - 3. Oral supplements
    - 4. Nutrition supplements
    - 5. Food-drug interactions
  - v. Communicating nutrition recommendations through appropriate medical documentation using the ADIME format;
  - vi. Attending medical rounds and patient care plan meetings with ICU team
  - vii. Coordinating care with patient's PCM and case management; and
  - viii. Performing patient handoff to floor dietitian if the patient is transferred out of the ICU.
- 3. **On-Call RDs** serve as backup dietitians in the event of an illness or emergency. On-call dietitians share the responsibilities of food service and clinical dietitians.
- 4. **Food Service and Clinical Nutrition Manager** provides leadership, oversight, and direction to both the food service and clinical staff. Primary responsibilities include:
  - a. Attending field hospital leadership and operations meetings and monitoring staffing needs;
  - b. Assessing menus and diet orders to ensure food items are appropriate;
  - c. Leading the administration and coordination of the food service contract with the onsite vendor;
  - d. Working with vendor, clinical staff, and field hospital leadership to assess and coordinate procurement of patient meals;
  - e. Coordinating with vendors and production dietitians to assess appropriateness of food items for each diet order and obtaining allergen information for each food item;
  - f. Leading communications with the clinical dietitians and assessing ongoing staffing needs; and
  - g. Ensuring adherence to food safety and clinical nutrition policies.
- 5. **Nutrition and Dietetics Technicians, Registered (NDTR)** provide nutrition care to patients to prevent malnutrition and optimize recovery. Primary responsibilities include:
  - a. Performing malnutrition screening using the Nutrition Screening Form and referring patients to a clinical dietitian as needed;
  - b. Collecting data on patients' dietary preferences, food allergies and/or intolerances;
  - c. Verifying diet ward rosters before each meal delivery;

- d. Communicating roster updates to food service dietitians;
- e. Preparing patient meal delivery carts;
- f. Delivering patient meals;
- g. Following food safety and equipment sanitation protocols; and
- h. Supporting maintenance of [Patient Census and Diet Order Tracker](#).

### 2.3. Two-day staffer training program

#### Purpose

The Training Program Syllabus is designed to orient new RDs and offer appropriate training on food service management, clinical nutrition, and nutrition support operations. These trainings should explain the organization of the field hospital, operational mandate for nutrition services, and coordinated protocol for simultaneously managing food services and performing clinical nutrition evaluations.

#### Utilization

This tool should be referenced during the planning phase of field hospital mobilizations and when onboarding new RDs. This comprehensive two-day training resource helps orient civilian RDs and offer appropriate training on food service management, clinical nutrition, and nutrition support operations for RDs who lack sufficient clinical experience.

#### Example of Training Program Syllabus

| Training Preparation                                    |                                                                                                                                                    |                                                                                                                                                                                                                                                                                                                                                                                                              |                                                                                                                                                                                                                                     |
|---------------------------------------------------------|----------------------------------------------------------------------------------------------------------------------------------------------------|--------------------------------------------------------------------------------------------------------------------------------------------------------------------------------------------------------------------------------------------------------------------------------------------------------------------------------------------------------------------------------------------------------------|-------------------------------------------------------------------------------------------------------------------------------------------------------------------------------------------------------------------------------------|
| JNYMS Layout Orientation and Walk-Thru of Service Areas |                                                                                                                                                    | Read Food Service and Clinical Operations Standard Operating Procedures                                                                                                                                                                                                                                                                                                                                      |                                                                                                                                                                                                                                     |
| Day 1 Schedule                                          |                                                                                                                                                    |                                                                                                                                                                                                                                                                                                                                                                                                              |                                                                                                                                                                                                                                     |
| Time                                                    | Nutrition Operations                                                                                                                               | Food Service Operations                                                                                                                                                                                                                                                                                                                                                                                      | Clinical Nutrition Operations                                                                                                                                                                                                       |
| 0630-0700                                               | <ul style="list-style-type: none"><li>• Arrive to JNYMS and report to Command Center.</li><li>• Attend morning brief with USPHS Leaders.</li></ul> | <ul style="list-style-type: none"><li>• Arrive to JNYMS and report to Food Service Operations.</li><li>• Review Patient Administration Division Tracker to identify newly admitted, transferred or discharged patients from JNYMS.</li><li>• Review 'Diet Order Change and Supplement Request Form' from night shift.</li><li>• Update 'Patient Census and Diet Order Tracker' and 'Diet Rosters.'</li></ul> | <ul style="list-style-type: none"><li>• Arrive to JNYMS and report to Clinical Nutrition Operations.</li><li>• Review Patient Administration Division Tracker to identify newly admitted patients and current ICU census.</li></ul> |
| 0700-0730                                               |                                                                                                                                                    | <ul style="list-style-type: none"><li>• Shadow NDTRs while they verify 'Diet Rosters.'</li></ul>                                                                                                                                                                                                                                                                                                             | <ul style="list-style-type: none"><li>• Review consulting process. Collect and triage 'Nutrition</li></ul>                                                                                                                          |

|           |                                                                                    |                                                                                                                                                                                                                                                                                                                                                        |                                                                                                                                                                                                                                                                                                 |
|-----------|------------------------------------------------------------------------------------|--------------------------------------------------------------------------------------------------------------------------------------------------------------------------------------------------------------------------------------------------------------------------------------------------------------------------------------------------------|-------------------------------------------------------------------------------------------------------------------------------------------------------------------------------------------------------------------------------------------------------------------------------------------------|
|           |                                                                                    | <ul style="list-style-type: none"> <li>Update 'Patient Census and Diet Order Tracker' and 'Diet Rosters' no later than 0730.</li> </ul>                                                                                                                                                                                                                | Consultation Forms' from the night shift.                                                                                                                                                                                                                                                       |
| 0730-0800 | <ul style="list-style-type: none"> <li>Observe Food Service Operations.</li> </ul> | <ul style="list-style-type: none"> <li>Observe and assist NDTRs build meal delivery carts and begin delivering meals.</li> </ul>                                                                                                                                                                                                                       | <ul style="list-style-type: none"> <li>Observe Critical Care Nutrition Team.</li> <li>Attend ICU rounds.</li> <li>Review of medical documentation process using the 'Modified ADIME Note.'</li> <li>Review 'Enteral Nutrition Formulary' and 'Enteral Nutrition Support Calculator.'</li> </ul> |
| 0800-0930 |                                                                                    | <ul style="list-style-type: none"> <li>Patient breakfast meal hours (0830-0930).</li> <li>Review Patient Administration Division Tracker to identify newly admitted, transferred or discharged patients from JNYMS.</li> <li>Update 'Patient Census and Diet Order Tracker' as needed.</li> </ul>                                                      |                                                                                                                                                                                                                                                                                                 |
| 0930-1000 |                                                                                    | <ul style="list-style-type: none"> <li>Tally meals delivered by diet order type referencing the 'Diet Roster.'</li> <li>Confirm total meals delivered with end of meal patient census.</li> <li>Update 'Patient Census and Diet Order Tracker.'</li> <li>Observe equipment sanitation procedures as NDTRs sanitize meal delivery carts.</li> </ul>     |                                                                                                                                                                                                                                                                                                 |
| 1000-1030 | <ul style="list-style-type: none"> <li>Meet with Food Contractors.</li> </ul>      | <ul style="list-style-type: none"> <li>Review Patient Administration Division Tracker.</li> <li>Update 'Patient Census and Diet Order Tracker' and 'Diet Rosters.'</li> <li>Shadow NDTRs while they verify 'Diet Rosters' on assigned wards.</li> <li>Update 'Patient Census and Diet Order Tracker' and 'Diet Rosters' no later than 1030.</li> </ul> |                                                                                                                                                                                                                                                                                                 |
| 1030-1100 |                                                                                    | <ul style="list-style-type: none"> <li>Observe and assist NDTRs build meal delivery carts and begin delivering meals.</li> </ul>                                                                                                                                                                                                                       |                                                                                                                                                                                                                                                                                                 |
| 1100-1200 | <ul style="list-style-type: none"> <li>Observe Food Service Operations.</li> </ul> | <ul style="list-style-type: none"> <li>Patient lunch meal hours (1100-1230).</li> <li>Routinely monitor Patient Administration Division Tracker for newly admitted patients.</li> <li>Update 'Patient Census and Diet Order Tracker' as needed.</li> </ul>                                                                                             | <ul style="list-style-type: none"> <li>RD Lunch Break</li> </ul>                                                                                                                                                                                                                                |
| 1200-1230 |                                                                                    |                                                                                                                                                                                                                                                                                                                                                        | <ul style="list-style-type: none"> <li>Shadow Floor Nutrition Team in the ICU.</li> </ul>                                                                                                                                                                                                       |

|                                                                                                                                                                                                                                                                                                                                                                                                   |                                                                                                                           |                                                                                                                                                                                                                                                                                                                                                            |                                                                                                                                                                                                                                                                                          |
|---------------------------------------------------------------------------------------------------------------------------------------------------------------------------------------------------------------------------------------------------------------------------------------------------------------------------------------------------------------------------------------------------|---------------------------------------------------------------------------------------------------------------------------|------------------------------------------------------------------------------------------------------------------------------------------------------------------------------------------------------------------------------------------------------------------------------------------------------------------------------------------------------------|------------------------------------------------------------------------------------------------------------------------------------------------------------------------------------------------------------------------------------------------------------------------------------------|
| 1230-1300                                                                                                                                                                                                                                                                                                                                                                                         |                                                                                                                           | <ul style="list-style-type: none"> <li>• Tally meals delivered by diet order type referencing the 'Diet Roster.'</li> <li>• Confirm total meals delivered with end of meal patient census.</li> <li>• Update 'Patient Census and Diet Order Tracker.'</li> <li>• Observe equipment sanitation procedures as NDTRs sanitize meal delivery carts.</li> </ul> | <ul style="list-style-type: none"> <li>• Observe NDTRs while they conduct nutrition screening using the 'Nutrition Screening Form.'</li> <li>• Perform medical documentation using the 'Modified ADIME Note.'</li> <li>• Shift change briefings with late shift clinical RDs.</li> </ul> |
| 1300-1430                                                                                                                                                                                                                                                                                                                                                                                         | <ul style="list-style-type: none"> <li>• RD lunch and shift change briefings with late shift Nutrition Ops RD.</li> </ul> | <ul style="list-style-type: none"> <li>• RD lunch break and shift change briefings with late shift food service RDs.</li> </ul>                                                                                                                                                                                                                            |                                                                                                                                                                                                                                                                                          |
| <p><b>Note:</b> In order to maintain proper wellness of the JNYMS staff, breaks are coordinated amongst the teams and are not outlined in this schedule. All staff are strongly encouraged to take breaks as needed being mindful of eating/drinking constraints due to PPE while in JNYMS. Practice proper don/doff procedures per the field hospital's infection control team instructions.</p> |                                                                                                                           |                                                                                                                                                                                                                                                                                                                                                            |                                                                                                                                                                                                                                                                                          |

### 3. Monitoring Inpatient Nutrition Status

#### 3.1. Overview

Designed to improve the consistency and quality of individualized care for patients, RDs follow the Nutrition Care Process (NCP), established by the Academy of Nutrition and Dietetics (AND) that includes a Nutrition Assessment, Nutrition Diagnosis, Nutrition Intervention, and Nutrition Monitoring and Evaluation steps [18,19]. Specifically, Nutrition Monitoring and Evaluation is used to determine and measure the amount of progress made for the nutrition intervention and whether the nutrition related goals and expected outcomes are being met [20]. In order to assess such progress, RDs will frequently reference the patient's EMR; however, access to such systems is not always possible in humanitarian crises despite their importance in disaster-related medical responses [21–23]. We provide these tools to improve the resilience and continuity of care of health services using easily-adapted, ready-to-use patient nutrition status screeners, trackers, and nutrition status assessments.

#### 3.2. Screener for inpatient nutrition status

##### Purpose

The Nutrition Screening Form is designed to collect nutrition-related information on all inpatients as efficiently as possible. This form was adapted from the Mini Nutritional Assessment and Subjective Global Assessment screening tools [24–26]. Questions specifically target the patients' ability to chew and swallow, food preferences, and food allergies to inform the composition and texture of therapeutic meals that patient receives.

##### Utilization

Prior to use, update the following fields:

- 'eFIND#' to the field hospital's/emergency facility's medical record numbering system
- 'Pod #' to the field hospital's/emergency facility's ward or floor division structure

This form can be used for initial and reassessment interviews by NTDRs to identify individuals at risk for malnutrition. A patient is classified as at risk for malnutrition and referred to a clinical dietitian if they report a 'fair' or 'poor appetite' appetite history *and* a 'recent' *and* 'unintentional' weight loss history. Patient-reported chewing or swallowing difficulties, cultural/religious food preferences, and food allergies should be communicated to food service staff. This information should also be updated on the [Patient Census and Diet Order Tracker](#).

##### Example of Nutrition Screening Form

| Nutrition Screening Form                                      |              |                                                        |                 |
|---------------------------------------------------------------|--------------|--------------------------------------------------------|-----------------|
| <i>Patient Name</i><br>(Last Name, First Name Middle Initial) | Doe, John S. | <i>Date</i>                                            | January 1, 2020 |
|                                                               |              | <i>eFIND #</i>                                         | XXXXX           |
| <i>Pod #</i>                                                  | 3            | <i>Room #</i>                                          | 20              |
| <b>Appetite History</b><br>(mark 'X' where applies)           |              | <b>Weight Loss History</b><br>(mark 'X' where applies) |                 |



|                                                                                    |   |                                                                        |                                      |                                |   |
|------------------------------------------------------------------------------------|---|------------------------------------------------------------------------|--------------------------------------|--------------------------------|---|
| <i>Good (75-100% of meals)</i>                                                     |   | <b>Recent weight loss?</b>                                             |                                      | <b>Reason for weight loss?</b> |   |
| <i>Fair (50-75% of meals)</i>                                                      | X | <i>Yes</i>                                                             | X                                    | <i>Intentional</i>             |   |
| <i>Poor (&lt;50% of meals)</i>                                                     |   | <i>No</i>                                                              |                                      | <i>Unintentional</i>           | X |
| <b>Chewing/Swallowing Difficulties?</b><br>(mark 'X' where applies)                |   | <b>Cultural/Religious Food Preferences</b><br>(mark 'X' where applies) |                                      |                                |   |
| <i>Yes</i>                                                                         |   | <i>Vegan</i>                                                           |                                      | <i>No Pork</i>                 |   |
| <i>No</i>                                                                          | X | <i>Vegetarian</i>                                                      |                                      | <i>Kosher</i>                  |   |
|                                                                                    |   | <i>Other</i>                                                           |                                      | <i>None</i>                    | X |
| <b>Describe 'Other' Cultural or Religious Food Preferences</b>                     |   |                                                                        |                                      |                                |   |
| <b>Food Allergies</b><br>(mark 'X' where applies)                                  |   |                                                                        |                                      |                                |   |
| <i>Gluten/Wheat</i>                                                                |   | <i>Fish/Shellfish</i>                                                  |                                      | <i>Peanut/Tree Nut</i>         |   |
| <i>Lactose Intolerant</i>                                                          |   | <i>Other</i>                                                           |                                      | <i>NKFA</i>                    | X |
| <b>Describe 'Other' Food Allergies If Applicable</b>                               |   |                                                                        |                                      |                                |   |
| <b>*** For Nutrition Operations Personnel Only ***</b><br>(mark 'X' where applies) |   |                                                                        |                                      |                                |   |
| <i>Did patient report Fair or Poor 'Appetite History'?</i>                         |   |                                                                        |                                      | <i>Yes</i>                     | X |
|                                                                                    |   |                                                                        |                                      | <i>No</i>                      |   |
| <i>Did patient report Recent and Unintentional 'Weight Loss History'?</i>          |   |                                                                        |                                      | <i>Yes</i>                     | X |
|                                                                                    |   |                                                                        |                                      | <i>No</i>                      |   |
| <b>If patient answered 'Yes' to both questions above, refer patient to RD.</b>     |   |                                                                        |                                      |                                |   |
| <b>Name of NDTR providing screening</b>                                            |   |                                                                        | <b>Name of patient's assigned RD</b> |                                |   |
| <i>NDTR 1</i>                                                                      |   |                                                                        | <i>Clinical RD 1</i>                 |                                |   |

You can download this form as a blank template from the [Appendix](#) or [from our website](#).

### 3.3. Modified ADIME note

#### Purpose

The Modified ADIME Note was adapted from Standardized Form 600: Chronological Record of Medical Care and the Nutrition Care Process note writing style [27–29]. ADIME stands for Assessment, Diagnosis, Intervention, Monitoring, and Evaluation – a five step process for examining the nutrition status of a patient. In the absence of an EMR, this reporting format prioritizes the assessment, diagnosis, and intervention components of ADIME, and enhances medical documentation efficiency.

#### Utilization

Prior to use, update the 'eFIND#' to the field hospital's medical record numbering system. After providing individual MNT, clinical RDs should document their nutrition assessment, diagnosis, and intervention plan and recommendations using the Modified ADIME Note. This document

should be placed into the patient's medical record and steps should be taken to communicate nutrition recommendations with the patient's primary care manager to optimize continuity of care.

### Example of Modified ADIME Note

| Modified ADIME Note                                                       |                                                                                                                                                                                                                                                                                                                                                                                                                                                                           |                                |                                                 |                 |
|---------------------------------------------------------------------------|---------------------------------------------------------------------------------------------------------------------------------------------------------------------------------------------------------------------------------------------------------------------------------------------------------------------------------------------------------------------------------------------------------------------------------------------------------------------------|--------------------------------|-------------------------------------------------|-----------------|
| <i>Patient Name</i><br><i>(Last Name, First Name Middle Initial)</i>      | Doe, John S.                                                                                                                                                                                                                                                                                                                                                                                                                                                              |                                | <i>Date</i>                                     | January 1, 2020 |
|                                                                           |                                                                                                                                                                                                                                                                                                                                                                                                                                                                           |                                | <i>eFIND #</i>                                  | XXXXXX          |
| <i>POD #</i>                                                              | 3                                                                                                                                                                                                                                                                                                                                                                                                                                                                         | <i>Room #</i>                  | 20                                              |                 |
| Anthropometric Measurements                                               |                                                                                                                                                                                                                                                                                                                                                                                                                                                                           |                                |                                                 |                 |
| <i>Age (yrs.)</i>                                                         | 32                                                                                                                                                                                                                                                                                                                                                                                                                                                                        | <i>Gender</i>                  | M                                               |                 |
| <i>Height (in.)</i>                                                       | 69                                                                                                                                                                                                                                                                                                                                                                                                                                                                        | <i>Weight (lbs.)</i>           | 170                                             |                 |
| <i>Ideal Body Weight (lbs.)</i>                                           | 156                                                                                                                                                                                                                                                                                                                                                                                                                                                                       | <i>% Ideal Body Weight (%)</i> | 109%                                            |                 |
| Laboratory Test Results                                                   |                                                                                                                                                                                                                                                                                                                                                                                                                                                                           |                                |                                                 |                 |
| <i>Na (mEq/L)</i>                                                         | 137                                                                                                                                                                                                                                                                                                                                                                                                                                                                       | <i>K (mEq/L)</i>               | 4.1                                             |                 |
| <i>Cl (ng/mL)</i>                                                         | 97                                                                                                                                                                                                                                                                                                                                                                                                                                                                        | <i>Glucose (mg/dL)</i>         | 100                                             |                 |
| <i>BUN (mg/dL)</i>                                                        | 20                                                                                                                                                                                                                                                                                                                                                                                                                                                                        | <i>Creatinine (mg/dL)</i>      | 1.1                                             |                 |
| <i>Other Labs</i><br><i>(list any others that apply and their values)</i> |                                                                                                                                                                                                                                                                                                                                                                                                                                                                           |                                |                                                 |                 |
| <i>Pertinent Medications</i>                                              |                                                                                                                                                                                                                                                                                                                                                                                                                                                                           |                                |                                                 |                 |
| <i>Propofol</i><br><i>(mark 'X' where applies)</i>                        | Yes                                                                                                                                                                                                                                                                                                                                                                                                                                                                       |                                | <i>Propofol Rate:</i><br><i>(if applicable)</i> |                 |
|                                                                           | No                                                                                                                                                                                                                                                                                                                                                                                                                                                                        | X                              |                                                 |                 |
| Estimated Nutritional Needs                                               |                                                                                                                                                                                                                                                                                                                                                                                                                                                                           |                                |                                                 |                 |
| <i>Estimated Energy Needs</i>                                             |                                                                                                                                                                                                                                                                                                                                                                                                                                                                           | 1,932 kcal/day (25 kcal/kg)    |                                                 |                 |
| <i>Estimated Protein Needs</i>                                            |                                                                                                                                                                                                                                                                                                                                                                                                                                                                           | 78 g/day (1 g/kg)              |                                                 |                 |
| <i>Estimated Fluid Needs</i>                                              |                                                                                                                                                                                                                                                                                                                                                                                                                                                                           | 2,328 mL/day (30 mL/kg)        |                                                 |                 |
| Nutrition Assessment                                                      |                                                                                                                                                                                                                                                                                                                                                                                                                                                                           |                                |                                                 |                 |
| <i>Current Nutrient Intake</i>                                            | Patient typically eats three meals per day, but over 1-2 weeks has experienced loss of appetite and struggles to eat more than once/day. Patient usually eats eggs and toast with a glass of milk for breakfast, grilled chicken salad with fruit and pretzels for lunch and 4-6 ounces of lean protein with a side of potatoes or pasta and a steamed vegetable. Patient now typically only eating toast with peanut butter and applesauce with a glass of orange juice. |                                |                                                 |                 |

|                                                     |                                                                                                                                                                                                                  |
|-----------------------------------------------------|------------------------------------------------------------------------------------------------------------------------------------------------------------------------------------------------------------------|
| <i>Nutrition Focused<br/>Physical Exam Findings</i> | Patient appears lean, athletic build.                                                                                                                                                                            |
| <b>Nutrition Diagnosis</b>                          |                                                                                                                                                                                                                  |
| <i>Nutrition Diagnosis</i>                          | Inadequate oral nutrient intake related to decreased ability to consume sufficient calories as evidenced by loss of appetite for 1-2 weeks prior to admission, decrease from 3 meals per day to 1 meal per day.  |
| <b>Nutrition Recommendations</b>                    |                                                                                                                                                                                                                  |
| <i>Nutrition Recommendations</i>                    | Encouraged small frequent meals. Recommend patient consume protein sources at mealtime first to optimize nutrient intake and preserve lean muscle mass. Patient receptive to trying Ensure Plus with lunch meal. |
| <b>Follow Up Date</b>                               | <b>RD Name, Signature &amp; Contact Information</b>                                                                                                                                                              |
| January 4, 2020                                     | Clinical RD 1<br>(XXX) XXX-XXXX                                                                                                                                                                                  |

You can download this form as a blank template from the [Appendix](#) or [from our website](#).

### 3.4. Tracker for patient census and diet orders

#### Purpose

The Patient Census and Diet Order Tracker is designed to facilitate meal forecasting in a disaster response setting. This is done by recording the number of patients consuming different types of meals over pre-determined mealtimes in a field hospital. Daily and weekly tallies of delivered meals can be used to estimate the popularity of food supplies in the patient population. This tracker also serves as a quality control tool in which the total number of meals delivered per food service period (e.g., breakfast, lunch, and dinner) can be matched to the current patient census.

#### Utilization

This tool is available as a weekly hard-copy tracker or as a modifiable Excel file. Prior to use, update the following fields:

- 'Diet Orders' to reflect the diet order types available at the field hospital; and
- 'Date' to ensure that the start date of each week is the day that meal forecasts must be distributed to the food suppliers.

This tracker carefully integrates with diet order and food allergy information to serve as a monitoring tool for successful and accurate meal delivery. This is done by recording the number of persons served for breakfast, lunch, and dinner according to each diet order. After each week, total meals served provides an estimate of the number of meals needed for the next week. This inventory assessment helps maintain adequate forecasting of supplies with food contractors. Additionally, this tool helps maintain proper food safety assurance and meal delivery coverage in accordance with USPHS Food Safety regulations.

### Example of Patient Census and Diet Order Tracker

|                   | 7-Mar  |     |     |  | 8-Mar  |     |     | WEEKLY<br>TOTALS |                   |
|-------------------|--------|-----|-----|--|--------|-----|-----|------------------|-------------------|
|                   | SUNDAY |     |     |  | MONDAY |     |     |                  |                   |
|                   | B      | L   | D   |  | B      | L   | D   |                  |                   |
| MEALS SERVED      | 329    | 332 | 339 |  | 361    | 353 | 347 | 7120             |                   |
| TOTAL CENSUS      | 329    | 319 | 330 |  | 343    | 333 | 340 | 7014             |                   |
|                   |        |     |     |  |        |     |     |                  |                   |
| DIET ORDERS       |        |     |     |  |        |     |     |                  | % OF MEALS SERVED |
| CORE4*            | 300    | 297 | 306 |  | 320    | 315 | 316 | 6138             | 86.21             |
| RENAL             | 11     | 5   | 0   |  | 0      | 1   | 1   | 32               | 0.45              |
| GI SOFT           | 3      | 7   | 10  |  | 7      | 6   | 6   | 120              | 1.69              |
| NDD2&3            | 0      | 0   | 0   |  | 4      | 4   | 5   | 129              | 1.81              |
| PUREED            | 0      | 0   | 0   |  | 0      | 0   | 1   | 17               | 0.24              |
| FULL LIQUID       | 0      | 0   | 0   |  | 0      | 0   | 0   | 5                | 0.07              |
| CLEAR LIQUID      | 0      | 0   | 0   |  | 0      | 0   | 0   | 1                | 0.01              |
| NPO               | 2      | 0   | 0   |  | 0      | 0   | 0   | 12               | 0.17              |
| KOSHER            | 6      | 8   | 9   |  | 11     | 7   | 9   | 219              | 3.08              |
| DAIRY FREE        | 7      | 15  | 14  |  | 19     | 20  | 9   | 300              | 4.21              |
| VEGETARIAN/ VEGAN | 0      | 0   | 0   |  | 0      | 0   | 0   | 54               | 0.76              |
| GLUTEN FREE       | 0      | 0   | 0   |  | 0      | 0   | 0   | 9                | 0.13              |
| NUTRITION SUPPORT | 0      | 0   | 0   |  | 0      | 0   | 0   | 84               | 1.18              |

\* Core 4 suitable for 'Regular,' 'Low Fat,' 'Low Sodium,' and 'Carb Controlled' diet orders.

You can download this form as a blank template [from our website](#).

### Overview of Patient Census and Diet Order Tracker Calculations

- One hour prior to meal delivery, personnel charged with delivering meals to patients should update the 'Total Census' with the number of patients in hospital (Example A).
- The tracker should then be distributed to food service personnel responsible for producing and supplying meals to inpatients.
- Food service personnel should calculate the correct quantity and type of meals by multiplying the total patient census and the percentage of orders per diet order type. Food service personnel will then package, store, and deliver meals in accordance with standard processes.
- Within 30 minutes of meal delivery to patients, meal delivery personnel should:
  - Tally diet orders per hospital ward to provide a total number of meals served by diet order type.
  - Update the tracker with the total number of meals distributed to all patients.
  - Compare the alignment of total 'Meals Served' to the 'Total Census' (Example A).
    - In the Excel version, 'Meals Served' auto calculates the sum of all meals delivered by diet order type to an aggregate total.
- Discrepancies between meals served and patient census totals should be addressed by food service personnel in the following ways:

- a. If fewer meals than the total census were served:
    - i. Verify the current hospital census at the end of the meal period and identify if patients were discharged during meal delivery.
    - ii. Verify diet ward rosters to ensure that all patients identified at the beginning of the meal period received a meal.
    - iii. Identify new hospital admissions during meal delivery and provide appropriate meal options in accordance with medical and nutritional prognoses.
  - b. If more meals than the total census were served:
    - i. Identify if and how many double-portion diet orders were placed by medical or nutritional staff.
    - ii. Provide a note indicating which patient(s) received double portions to properly adjust diet order tallies.
6. Once all daily values are verified, report the sum of all 'Meals Served' and 'Diet Orders' in the 'Weekly Totals' column (Example B).
  - a. In the Excel version, 'Weekly Totals' for 'Meals Served' and 'Diet Orders' will auto-populate.
  - b. Distribute the completed tracker to food suppliers once data have been finalized on the seventh day of the weekly cycle.
  - c. Calculate the '% of Meals Served' per diet order by dividing the 'Weekly Totals for *Diet Order 1*' by the 'Weekly Total of Meals Served' and multiplying the output by 100.
    - i. The sum of all the '% of Meals Served' should total 100%
7. Use the product of the '% of Meals Served' and weekly total of each diet order to facilitate meal forecasting for the following weekly cycle.

### 3.5. Diet roster

#### Purpose

The Diet Roster is designed to quickly identify patients' diet orders, food allergies, and oral nutrition supplement requirements during meal delivery. The roster should be completed for every patient ward or floor by the assigned NDTR. This form should be reviewed and updated regularly as patients are admitted and discharged.

#### Utilization

First, update the '*eFIND#*' to the field hospital's medical record numbering system. Prior to meal delivery, NDTRs should review the patient's medical record to verify their diet order, food allergy information, and oral nutrition supplement requirements. This information should be transcribed onto the diet roster. This form is then referenced when building patient meal delivery carts. After the patient meal is delivered, NDTRs cross off the appropriate 'Meal Delivered' column ('B' for breakfast, 'L' for lunch, and 'D' for dinner). After all patients on the assigned ward or floor have received a meal, the NDTR submits the roster to the food service dietitian. The food service dietitian then uses the roster to:

- Determine the number of meals delivered per meal period (used in the [Patient Census and Diet Order Tracker](#)); and
- Update the Patient Census and Diet Order Tracker with changes to diet orders or oral nutrition supplement requirements and food allergy information.

Example of Diet Roster Form

| Diet Roster                                                                                                                                             |          |                                                        |        |                               |                |                            |                |   |   |
|---------------------------------------------------------------------------------------------------------------------------------------------------------|----------|--------------------------------------------------------|--------|-------------------------------|----------------|----------------------------|----------------|---|---|
| Date                                                                                                                                                    |          | January 1, 2020                                        |        | Pod #                         |                |                            | 3              |   |   |
| Line                                                                                                                                                    | Bed/Room | Patient Name<br>(Last Name, First Name Middle Initial) | eFIND# | Diet Order                    | Food Allergies | Oral Nutrition Supplements | Meal Delivered |   |   |
| 1                                                                                                                                                       | 10       | Doe, John S.                                           | XXXXX  | Renal                         | None           | None                       | B              | L | D |
| 2                                                                                                                                                       | 12       | Smith, Jane                                            | YYYYY  | Core4                         | Nuts           | Glucerna with Breakfast    | B              | L | D |
| 3                                                                                                                                                       | ...      | ...                                                    | ...    | ...                           | ...            | ...                        | B              | L | D |
| Provide this form to the food service dietitian at the end of meal delivery. Discuss changes to ward roster, barriers to delivering patient meals, etc. |          |                                                        |        | Name of NDTR assigned to Ward |                |                            |                |   |   |
|                                                                                                                                                         |          |                                                        |        | NDTR 1                        |                |                            |                |   |   |

You can download this form as a blank template from the [Appendix](#) or [from our website](#).



## 4. Receiving Nutrition Concerns from Field Hospital Staff

### 4.1. Overview

Registered Dietitians frequently work hand-in-hand with primary care providers as part of a multidisciplinary healthcare team to deliver coordinated care. RDs are an integral part of a patient's health care, as they are trained to assess the nutrition-related health needs of patients, considering other factors affecting nutrition and health status (e.g., culture, ethnicity, and social determinants of health), provide nutrition counseling and nutrition education to optimize nutritional status, prevent disease, or maintain and/or improve health and well-being [19]. Research has shown consulting a RD in primary care settings appear effective for improving diet quality, diabetes outcomes, and weight loss outcomes [30]. However, additional studies have found low referral rates from primary care clinicians to a RD amongst the most vulnerable patients such as those at risk of malnutrition [31].

### 4.2. Nutrition consultation form

#### Purpose

The Nutrition Consultation Form is designed to streamline requests from the patient's primary care manager or nursing team for nutrition consultation by a clinical RD. This consultation is designed to be conducted with limited contact time (<5 minutes), performed at a distance (to accommodate medical personnel safety), and integrate assessments, recommendations, and educational needs within the same form.

#### Utilization

Prior to use, update the 'eFIND#' to the field hospital's medical record numbering system. The patient's primary care manager or nursing team should complete the Nutrition Consultation Form when requesting nutrition assessment or education from a clinical RD.

#### Example of Nutrition Consultation Form

| Nutrition Consultation Form                                     |              |                                                                               |                 |
|-----------------------------------------------------------------|--------------|-------------------------------------------------------------------------------|-----------------|
| <i>Requesting PCM</i><br>(Last Name, First Name Middle Initial) | Doctor 1     | <i>Requesting PCM</i><br><i>Contact Information</i><br>(pager or cell number) | (XXX) XXX-XXXX  |
| Patient Information                                             |              |                                                                               |                 |
| <i>Patient Name</i><br>(Last Name, First Name Middle Initial)   | Doe, John S. | <i>Date</i>                                                                   | January 1, 2020 |
|                                                                 |              | <i>eFIND #</i>                                                                | XXXXX           |
| <i>POD #</i>                                                    | 3            | <i>Room #</i>                                                                 | 20              |
| Patient Nutrition Status                                        |              |                                                                               |                 |

|                                                                                                                                                      |                                                                                                                       |     |   |
|------------------------------------------------------------------------------------------------------------------------------------------------------|-----------------------------------------------------------------------------------------------------------------------|-----|---|
| Is this consultation regarding patient's nutrient intake, including concerns for malnutrition, chewing/swallowing, etc.?<br>(mark 'X' where applies) |                                                                                                                       | Yes |   |
|                                                                                                                                                      |                                                                                                                       | No  | X |
| If 'Yes,' describe.                                                                                                                                  |                                                                                                                       |     |   |
| <b>Patient Nutrition Recommendations</b>                                                                                                             |                                                                                                                       |     |   |
| Is this consultation regarding nutrition support recommendations?<br>(mark 'X' where applies)                                                        |                                                                                                                       | Yes |   |
|                                                                                                                                                      |                                                                                                                       | No  | X |
| If 'Yes,' describe.                                                                                                                                  |                                                                                                                       |     |   |
| <b>Patient Nutrition Education Recommendations</b>                                                                                                   |                                                                                                                       |     |   |
| Is this consultation for nutrition education?<br>(mark 'X' where applies)                                                                            |                                                                                                                       | Yes | X |
|                                                                                                                                                      |                                                                                                                       | No  |   |
| If 'Yes,' describe patient's nutrition education needs                                                                                               | Patient newly diagnosed with hypertension, please provide appropriate nutrition instruction to optimize heart health. |     |   |
| <b>*** For Nutrition Operations Personnel Only ***</b>                                                                                               |                                                                                                                       |     |   |
| Name of clinical RD assigned to address this nutrition consultation                                                                                  | Clinical RD 1                                                                                                         |     |   |

You can download this form as a blank template from the [Appendix](#) or [from our website](#).

### 4.3. Diet order change and supplement request form

#### Purpose

The Diet Order Change and Supplement Request Form is designed to streamline changes in diet orders and/or oral nutrition supplements requested by the patient's primary care manager. This is of particular importance if a field hospital lacks an EMR for recording patient nutrition and medical status. Furthermore, such a form can ensure that therapeutic meals reconcile with medical prognoses and treatments.

#### Utilization

Prior to use, update the 'eFIND#' to the field hospital's medical record numbering system. The patient's primary care manager should complete the Diet Order Change and Supplement Request Form following a new diet order and/or prescription for an oral nutrition supplement. If an oral nutrition supplement is selected, the frequency and timing of supplement delivery must also be selected. This form is then submitted to Nutrition Operations personnel or the designated personnel's mailbox. Food service dietitians then update the Patient Census and Diet Order Tracker with the changes.

### Example of Diet Order Change and Supplement Request Form

| Diet Order Change and Supplement Request Form                                         |             |                   |                                                                            |           |   |
|---------------------------------------------------------------------------------------|-------------|-------------------|----------------------------------------------------------------------------|-----------|---|
| <i>Patient Name</i><br><i>(Last Name, First Name Middle Initial)</i>                  | Doe, John S | Date              | 1 January, 2020                                                            |           |   |
|                                                                                       |             | eFIND #           | XXXXXX                                                                     |           |   |
| POD #                                                                                 | 3           | Room #            | 20                                                                         |           |   |
| <b>Select the New Diet Order for Patient</b><br>(mark 'X' where applies)              |             |                   |                                                                            |           |   |
| Regular/Consistent Carb/Heart Healthy/Low Sodium                                      |             |                   | National Dysphagia Diet (Ground)                                           |           |   |
| Renal                                                                                 |             |                   | Puree                                                                      |           |   |
| Kosher                                                                                |             |                   | Full Liquid                                                                |           |   |
| Dairy-Free                                                                            |             |                   | Clear Liquid                                                               |           |   |
| <b>Select a Nutrition Supplement</b><br>(mark 'X' where applies)                      |             |                   | <b>Frequency/Timing of Supplement Delivery</b><br>(mark 'X' where applies) |           |   |
| Ensure Plus                                                                           | X           | 1x per day        |                                                                            | Breakfast |   |
| Glucerna                                                                              |             | 2x per day        | X                                                                          | Lunch     | X |
| Nepro                                                                                 |             | 3x per day        |                                                                            | Dinner    | X |
| <b>*** For Nutrition Operations Personnel Only ***</b><br>(mark 'X' where applies)    |             |                   |                                                                            |           |   |
| Has the 'Patient Census and Diet Order Tracker' been updated?                         |             |                   | Yes                                                                        |           | X |
|                                                                                       |             |                   | No                                                                         |           |   |
| <b>Name of food service RD confirming the 'Patient Census and Diet Order Tracker'</b> |             | Food Service RD 1 |                                                                            |           |   |

You can download this form as a blank template from the [Appendix](#) or [from our website](#).

#### 4.4. Food temperature log

##### Purpose

The Food Temperature Log is designed to monitor and record food temperatures to ensure food is safe when stored, prepared, and served. This is of particular importance when meal preparation occurs at an off-site facility and must be transported to the field hospital for before each meal delivery.

##### Utilization

One log is needed per day of patient meal delivery. Nutrition staff and personnel should perform temperature checks on a predetermined sample proportion of meals and/or food items per meal period. If there is a discrepancy between the temperature taken and the appropriate temperature to maintain food safety, the food service dietitian is alerted and implements a corrective action.

- Appropriate cold chain management:  $\leq 41^{\circ}\text{F}$  ( $5^{\circ}\text{C}$ )
- Appropriate hot chain management:  $>135^{\circ}\text{F}$  ( $57^{\circ}\text{C}$ )

| Patient Food Temperature Log |           |                         |                                       |                                             |                                        |   |
|------------------------------|-----------|-------------------------|---------------------------------------|---------------------------------------------|----------------------------------------|---|
| Date                         |           | January 1, 2020         |                                       | Pod #                                       |                                        | 3 |
| Breakfast Meal Delivery      |           |                         |                                       |                                             |                                        |   |
| Time                         | Meal Type | Food Item               | Measured Temp. ( $^{\circ}\text{F}$ ) | Corrective Action                           | Initials of Person Recording the Temp. |   |
| 6:45 AM                      | Core4     | Milk                    | 39 $^{\circ}$                         | N/A                                         | RD1                                    |   |
| 6:47 AM                      | Core4     | Vanilla Yogurt          | 40 $^{\circ}$                         | N/A                                         | RD1                                    |   |
| 6:50 AM                      | Core4     | String Cheese           | 42 $^{\circ}$                         | Return to fridge for cooling before served  | RD1                                    |   |
| Lunch Meal Delivery          |           |                         |                                       |                                             |                                        |   |
| 11:45 AM                     | Core4     | Beef Pot Roast          | 139 $^{\circ}$                        | N/A                                         | RD1                                    |   |
| 11:57 AM                     | Core4     | Chocolate Pudding       | 39 $^{\circ}$                         | N/A                                         | RD1                                    |   |
| 12:04 AM                     | Core4     | Steamed Carrots         | 140 $^{\circ}$                        | NA                                          | RD1                                    |   |
| Dinner Meal Delivery         |           |                         |                                       |                                             |                                        |   |
| 4:55 AM                      | Core4     | Tomato Soup             | 134 $^{\circ}$                        | Warm for additional 2 minutes before served | RD1                                    |   |
| 4:59 AM                      | Core4     | Fruit Cup               | 39 $^{\circ}$                         | N/A                                         | RD1                                    |   |
| 5:12 AM                      | Core4     | Unsweetened Apple Sauce | 41 $^{\circ}$                         | NA                                          | RD1                                    |   |

You can download this form as a blank template from the [Appendix](#) or [from our website](#).

## 5. Calculating Patient Nutrition Support Needs

### 5.1. Overview

The scope of practice for RDs also includes the ordering and monitoring of nutrition interventions to meet estimated nutrient and energy needs, including but not limited to prescribed diets, medical foods, dietary supplements, and nutrition support therapies (i.e., enteral nutrition support) [19]. The Academy of Nutrition and Dietetics offers few calculators, via the 'Nutrition Care Manual,' to estimate a body mass index and energy requirements or perform metric conversions, which are essential to the NCP [32]. However, a gap exists for similar tools when calculating a patient's nutrition support needs. The American Society of Parenteral and Enteral Nutrition does offer an algorithmic practice tools to aid decisions surrounding the appropriateness of nutrition support therapies, but, yet again, a practice tool or calculator for the everyday clinician is missing [33].

### 5.2. Guide for enteral formulary

#### Purpose

The Enteral Nutrition Formulary Guide is designed to provide a comprehensive overview of nutrition information provided by oral nutrition supplements, enteral nutrition formulas, and modulars. This tool is provided to help identify key macronutrient and micronutrient levels in each supplement, formula, or modular for calculating recommended doses.

#### Utilization

This tool is available as a modifiable Excel file. Prior to use, update this formulary based on available oral nutrition supplements, enteral nutrition formulas, and modulars. This information can often be found on the product's nutrition facts label or from the supplier's website. Once updated, this tool should be referenced when calculating a patient's estimated nutrient requirements and when discussing available oral nutrition supplements, enteral nutrition formulas and modulars with other healthcare professionals.

#### Example of Enteral Nutrition Formulary Guide

| Enteral Nutrition Formulary Guide |                 |             |                   |         |           |             |                |                  |            |
|-----------------------------------|-----------------|-------------|-------------------|---------|-----------|-------------|----------------|------------------|------------|
| Enteral Formulas                  |                 |             |                   |         |           |             |                |                  |            |
| Name                              | Calories (kcal) | Protein (g) | Carbohydrates (g) | Fat (g) | Fiber (g) | Sodium (mg) | Potassium (mg) | Phosphorous (mg) | Water (mL) |
| Promote 1.0 (per carton)          | 237             | 14.8        | 30.8              | 6.2     | --        | 240         | 470            | 285              | 198        |
| Promote 1.0 (per liter)           | 1000            | 62.5        | 130               | 26      | --        | 1000        | 1980           | 1200             | 839        |

|                                         |      |      |       |      |    |      |      |      |     |
|-----------------------------------------|------|------|-------|------|----|------|------|------|-----|
| Jevity 1.2<br>(per carton)              | 285  | 13.2 | 40.2  | 9.3  | 4  | 253  | 566  | 284  | 191 |
| Jevity 1.2<br>(per liter)               | 1200 | 55.5 | 168.4 | 39.3 | 17 | 1067 | 2390 | 1200 | 807 |
| <b>Oral Nutrition Supplements</b>       |      |      |       |      |    |      |      |      |     |
| Ensure Plus<br>(Vanilla &<br>Chocolate) | 350  | 13   | 51    | 11   | 3  | 220  | 470  | 275  | -   |
| Glucerna<br>(Vanilla &<br>Chocolate)    | 180  | 10   | 16    | 9    | 4  | 210  | 470  | 275  | -   |
| Nepro<br>(Vanilla)                      | 425  | 19.1 | 37.9  | 22.7 | 3  | 250  | 250  | 170  | -   |
| <b>Modulars</b>                         |      |      |       |      |    |      |      |      |     |
| Prosource                               | 40   | 11   | <1    | 0    | -  | 35   | 11   | 48   | -   |
| Banatrol                                | 40   | <1   | 10    | 0    | -  | 45   | 120  | 9    | -   |

You can download this form as a blank template [from our website](#).

### 5.3. Enteral nutrition recommendation calculator

#### Purpose

The Enteral Nutrition Support Calculator is designed to support RDs when calculating the provision of calories, protein, and fluid for various enteral nutrition formulas. This calculator is meant to provide a quick reference for field hospital clinical nutrition staff and aims to improve efficiency and reduce errors when estimating patients' nutrition support requirements. Details on nutrient provision should be ascertained from the enteral nutrition formula's manufacturer's website.

#### Utilization

This tool is available as a modifiable Excel file. Prior to use, update the [Enteral Nutrition Formulary Guide](#) tool for quick reference when completing 'Part B: Select enteral nutrition formula'

| Enteral Nutrition Support Calculator            |                       |                                            |                                         |                                  |
|-------------------------------------------------|-----------------------|--------------------------------------------|-----------------------------------------|----------------------------------|
| <b>Part A. Re-calculate patient weight</b>      |                       |                                            |                                         |                                  |
| Patient Weight (lbs)                            |                       | Patient Weight (kg)                        |                                         |                                  |
| 150                                             |                       | 68.18                                      |                                         |                                  |
| <b>Part B: Select enteral nutrition formula</b> |                       |                                            |                                         |                                  |
| Formula Name                                    | Calories<br>(Kcal/mL) | Protein Per Liter<br>(g protein/L formula) | Water Per Liter<br>(mL water/L formula) | Formula Volume<br>(mL/container) |



|                                                                     |     |                                                      |     |                                                      |
|---------------------------------------------------------------------|-----|------------------------------------------------------|-----|------------------------------------------------------|
| Promote                                                             | 1.0 | 62.5                                                 | 839 | 1000                                                 |
| <b>Part C: Recommended hourly rate and length of administration</b> |     |                                                      |     |                                                      |
| <i>Hourly Goal Rate (mL/hr)</i>                                     |     | <i>Length of Administration (hr)</i>                 |     | <i>Total Volume (mL)</i>                             |
| 55                                                                  |     | 24                                                   |     | 1320                                                 |
| <b>Part D: Calculate enteral nutrition support recommendations</b>  |     |                                                      |     |                                                      |
| <i>Calories Per Day<br/>(Kcal/d)</i>                                |     | <i>Protein Per Day<br/>(g protein/d)</i>             |     | <i>Water Per Day<br/>(mL water/d)</i>                |
| 1320                                                                |     | 82.5                                                 |     | 1107.3                                               |
| <i>Calories Per Weight<br/>(Kcal/kg patient)</i>                    |     | <i>Protein Per Weight<br/>(g protein/kg patient)</i> |     | <i>Containers Formula Per Day<br/>(containers/d)</i> |
| 19.4                                                                |     | 1.21                                                 |     | 1.3                                                  |
| <b>Notify Food Service Personnel Once Completed</b>                 |     |                                                      |     |                                                      |

You can download this form as a blank template [from our website](#).

#### Overview of Patient Census and Diet Order Tracker Calculations

- To use the Enteral Nutrition Support Calculator, begin by converting the patient's weight from pounds to kilograms in 'Part A: Re-calculate patient weight.' This step must be completed to calculate the calories and protein provided by formula per kilogram patient weight in 'Part D: Calculate enteral nutrition support recommendations.'
  - Enter the patient's weight in pounds in the yellow cell to convert the weight from pounds to kilograms (calculated in adjacent white cell).
- Update 'Part B: Select enteral nutrition formula' with information from the [Enteral Nutrition Formulary Guide](#) tool. The information entered in the yellow cells includes:
  - Calories provided per milliliter of selected formula;
  - Protein provided per liter of the selected enteral formula;
  - Water provided per liter of the selected enteral formula; and
  - Milliliters of formula per container of the selected enteral formula.
- Update 'Part C: Recommend hourly rate and length of admission' with your recommended hourly rate and total hours of administration per day to auto calculate the 'Total Volume (mL)' of enteral nutrition provided per day. The information entered in the yellow cells includes:
  - The recommended hourly rate of enteral nutrition administration; and
  - The recommended total hours of enteral nutrition formula administration per day.
- Review the auto-calculations performed in 'Part D: Calculate enteral nutrition support recommendations,' which include:
  - 'Calories per Day (kcal/d)' calculated as the product of the total volume of formula delivered from 'Part C: Recommend hourly rate and length of admission' and the calories per milliliter of enteral nutrition formula from 'Part B: Select enteral nutrition formula;'

- b. 'Calories per Patient Weight (kcal/kg patient)' calculated as the quotient of the 'Calories Per Day (kcal/d)' calculated above and the patient weight in kilograms from '*Part A: Re-calculate patient weight;*'
  - c. 'Protein per Day (g protein/d)' calculated as the product of the protein per one liter (or one thousand milliliters) formula from '*Part B: Select enteral nutrition formula*' and the total volume of formula delivered from '*Part C: Recommend hourly rate and length of admission;*'
  - d. 'Protein per Patient Weight (g protein/kg patient)' calculated as the quotient of the 'Protein Per Day (g protein/d)' calculated above and the patient weight in kilograms from '*Part A: Re-calculate patient weight;*'
  - e. 'Water per Day (mL water/d)' calculated as the product of the water per one liter formula (or one thousand milliliters) from '*Part B: Select enteral nutrition formula*' and the total volume of formula delivered from '*Part C: Recommend hourly rate and length of admission;*' and
  - f. 'Containers Formula per Day (containers/d)' calculated as the quotient of the total volume of formula delivered from '*Part C: Recommend hourly rate and length of admission*' and the total volume of the formula per container from '*Part B: Select enteral nutrition formula.*'
5. Communicate nutrition support recommendations, specifically the number of cartons or liters recommended for your patient, to food service personnel tasked with delivering meals. Limit enteral nutrition support recommendations to only the calculations appropriate for your available enteral nutrition formulary.

## **Future Directions**

As the COVID-19 pandemic continues, we call upon the broader research and practice community, including the Academy of Nutrition and Dietetics, to develop guidelines for nutrition services in medical facilities. These guidelines must target training competencies for RDs, NDTRs, and other nutrition-related personnel providing medical care in field hospitals or emergency facilities during humanitarian crises. While the Nutrition Response Toolkit for Humanitarian Crises provides a foundation for such services, this toolkit must be expanded to enhance the scalability and generalizability of these tools for future emergency response efforts. This can only be done by collaborating with other medical and nutrition service professionals, who together can document shared and new experiences that warrant new tools for field response-related challenges. We welcome this future collaboration, and hope that these low-cost, easily-adaptable nutrition services and assessments tools can be aid nutrition personnel in future field hospital deployments and humanitarian emergencies.

## **Authors and Acknowledgements**

The first draft of this toolkit was prepared by Emily Sanchez, MS, RD, CNSC of the Tufts University Friedman School of Nutrition Science and Policy and Army Medical Department Student Detachment, U.S. Army Medical Center of Excellence, Amy R. Gelfand, MS, RD, CNSC of the Bureau of Supplemental Food Programs, New York State Department of Health, Michael D. Perkins, MS, RDN of the Bureau of Supplemental Food Programs, New York State Department of Health, Maia C. Tarnas of the Community Research Initiative of New England, Ryan B. Simpson, MS of the Tufts University Friedman School of Nutrition Science and Policy, Jarrod A. McGee, FACHE, MHA, MBA of Army-Baylor University and the United States Army 1<sup>st</sup> Medical Brigade, William Beaumont Army Medical Center, and Dr. Elena N. Naumova of the Tufts University Friedman School of Nutrition Science and Policy.

The authors thank the Nutrition Operations Team and multi-agency collaborators at the Javits New York Medical Station, to include the New York State Department of Health, for their commitment to data collection in support of improving disaster response efforts for nutrition personnel.

## References

1. Soeters, P.B.; Schols, A.M.W.J. Advances in Understanding and Assessing Malnutrition. *Curr Opin Clin Nutr Metab Care* **2009**, *12*, 487–494, doi:10.1097/MCO.0b013e32832da243.
2. ASPEN Definitions: Malnutrition Available online: [https://www.nutritioncare.org/Guidelines\\_and\\_Clinical\\_Resources/Toolkits/Malnutrition\\_Toolkit/Definitions/](https://www.nutritioncare.org/Guidelines_and_Clinical_Resources/Toolkits/Malnutrition_Toolkit/Definitions/) (accessed on 26 April 2021).
3. AND *Academy of Nutrition and Dietetics: Definition of Terms List*; Academy of Nutrition and Dietetics: Definition of Terms List, 2021; p. 79;.
4. ASPEN What Is Nutrition Support Therapy Available online: [https://www.nutritioncare.org/About\\_Clinical\\_Nutrition/What\\_is\\_Nutrition\\_Support\\_Therapy/](https://www.nutritioncare.org/About_Clinical_Nutrition/What_is_Nutrition_Support_Therapy/) (accessed on 25 April 2021).
5. Sisak, M. Many Field Hospitals Went Largely Unused, Will Be Shut Down. *Military Times* 2020.
6. Mash, R.; Presence-Vollenhoven, M.; Adeniji, A.; Christoffels, R.; Doubell, K.; Eksteen, L.; Henrikse, A.; Hutton, L.; Jenkins, L.; Kapp, P.; et al. Evaluation of Patient Characteristics, Management and Outcomes for COVID-19 at District Hospitals in the Western Cape, South Africa: Descriptive Observational Study. *BMJ Open* **2021**, *11*, e047016–e047016, doi:10.1136/bmjopen-2020-047016.
7. Francke, R.-L. Covid-19 Field Hospital Opens in Mitchells Plain. *IOL News* 2021.
8. Canadian Press Ontario Says a COVID-19 Field Hospital Is Expected to Take Patients This Month. *CTV News* 2021.
9. BBC Wales Covid-19: Are Field Hospitals Operating in Wales? *BBC News* 2020.
10. Lewis, M.M.; Bower, A.; Cuyler, M.T.; Eden, R.; Harper, R.E.; Gonzalez Morganti, K.; Resnick, A.C.; Steiner, E.D.; Valdez, R.S. New Equipping Strategies for Combat Support Hospitals. *RAND Health Quarterly* **2012**, *2*, 2.
11. LaBrecque, M.F.; Honsberger, M.A. *Army Field Hospitals and Expeditionary Hospitalization*; Army Sustainment Professional Bulletin; United States Army, 2018;
12. Davis, L.E.; Rough, J.; Cecchine, G.; Schaefer, A.G.; Rohn, L.L. *Hurricane Katrina: Lessons for Army Planning and Operations*; RAND Corporation, 2007; p. 106;.
13. Larson, E.V.; Boling, B.; Eaton, D.; Genc, S.; Kravitz, D.; Leuschner, K.J.; Lewis, A.; Liggett, J.; Polley, L. *U.S. Army North in the Hurricane Maria Response*; RAND Corporation, 2020; p. 236;.
14. Sanchez, E.; Gelfand, A.R.; Perkins, M.D.; Tarnas, M.C.; Simpson, R.B.; McGee, J.A.; Naumova, E.N. Providing Food and Nutrition Services during the COVID-19 Surge at the Javits New York Medical Station. *In Review* **2021**.
15. Accreditation Council for Education in Nutrition and Dietetics *ACEND Accreditation Standards for Nutrition and Dietetics Internship Programs (DI)*; Academy of Nutrition and Dietetics, 2018;
16. United States Army *Theater Hospitalization*; Department of the Army: Headquarters, 2020;
17. Joint Commission *Surge Hospitals: Providing Safe Care in Emergencies*; Joint Commission on Accreditation of Healthcare Organizations, 2006;

18. AND Nutrition Care Process Available online: <https://www.andeal.org/ncp> (accessed on 3 May 2021).
19. The Academy Quality Management Committee Academy of Nutrition and Dietetics: Revised 2017 Scope of Practice for the Registered Dietitian Nutritionist. *Journal of the Academy of Nutrition and Dietetics* **2017**, *118*, 141–165, doi:10.1016/j.jand.2017.10.002.
20. AND NCP Step 4: Nutrition Monitoring and Evaluation 2018.
21. Horahan, K.; Morchel, H.; Raheem, M.; Stevens, L.; Pawlak, S. Electronic Health Records Access during a Disaster. *1* **2014**, *5*, doi:10.5210/ojphi.v5i3.4826.
22. Oza, S.; Jazayeri, D.; Teich, J.M.; Ball, E.; Nankubuge, P.A.; Rwebembera, J.; Wing, K.; Sesay, A.A.; Kanter, A.S.; Ramos, G.D.; et al. Development and Deployment of the OpenMRS-Ebola Electronic Health Record System for an Ebola Treatment Center in Sierra Leone. *J Med Internet Res* **2017**, *19*, e294, doi:10.2196/jmir.7881.
23. deRiel, E.; Puttkammer, N.; Hyppolite, N.; Diallo, J.; Wagner, S.; Honoré, J.G.; Balan, J.G.; Celestin, N.; Vallès, J.S.; Duval, N.; et al. Success Factors for Implementing and Sustaining a Mature Electronic Medical Record in a Low-Resource Setting: A Case Study of ISanté in Haiti. *Health Policy and Planning* **2017**, *33*, 237–246, doi:10.1093/heapol/czx171.
24. MNA Mini Nutritional Assessment (MNA) 2009.
25. Kaiser, M.J.; Bauer, J.M.; Ramsch, C.; Uter, W.; Guigoz, Y.; Cederholm, T.; Thomas, D.R.; Anthony, P.; Charlton, K.E.; Maggio, M.; et al. Validation of the Mini Nutritional Assessment Short-Form (MNA-SF): A Practical Tool for Identification of Nutritional Status. *J Nutr Health Aging* **2009**, *13*, 782–788, doi:10.1007/s12603-009-0214-7.
26. Detsky, A.S.; McLaughlin; Baker, J.P.; Johnston, N.; Whittaker, S.; Mendelson, R.A.; Jeejeebhoy, K.N. What Is Subjective Global Assessment of Nutritional Status? *Journal of Parenteral and Enteral Nutrition* **1987**, *11*, 8–13, doi:https://doi.org/10.1177/014860718701100108.
27. US General Services Administration Standard Form 600: Chronological Record of Medical Care.
28. Lacey, K.; Pritchett, E. Nutrition Care Process and Model: ADA Adopts Road Map to Quality Care and Outcomes Management. *J Am Diet Assoc* **2003**, *103*, 1061–1072, doi:10.1016/s0002-8223(03)00971-4.
29. Thompson, K.L.; Davidson, P.; Swan, W.I.; Hand, R.K.; Rising, C.; Dunn, A.V.; Lewis, N.; Murphy, W.J. Nutrition Care Process Chains: The “Missing Link” between Research and Evidence-Based Practice. *J Acad Nutr Diet* **2015**, *115*, 1491–1498, doi:10.1016/j.jand.2015.04.014.
30. Mitchell, L.J.; Ball, L.E.; Ross, L.J.; Barnes, K.A.; Williams, L.T. Effectiveness of Dietetic Consultations in Primary Health Care: A Systematic Review of Randomized Controlled Trials. *J Acad Nutr Diet* **2017**, *117*, 1941–1962, doi:10.1016/j.jand.2017.06.364.
31. Eglseer, D.; Bauer, S. Predictors of Dietitian Referrals in Hospitals. *Nutrients* **2020**, *12*, doi:10.3390/nu12092863.
32. AND Nutrition Care Manual 2020.
33. ASPEN Nutrition Care Algorithm Available online: [https://www.nutritioncare.org/Guidelines\\_and\\_Clinical\\_Resources/Toolkits/Malnutrition\\_Toolkit/Nutrition\\_Care\\_Algorithm/](https://www.nutritioncare.org/Guidelines_and_Clinical_Resources/Toolkits/Malnutrition_Toolkit/Nutrition_Care_Algorithm/).

## Appendices

### **Appendix 1. Fillable Nutrition Screening form (section 3.2)**

The Nutrition Screening Form is designed to collect nutrition-related information on all inpatients as efficiently as possible. This form was adapted from the Mini Nutritional Assessment and Subjective Global Assessment screening tools [24–26]. Questions specifically target the patients' ability to chew and swallow, food preferences, and food allergies to inform the composition and texture of therapeutic meals that patient receives.

### **Appendix 2. Fillable form of the Modified ADIME Note (section 3.3)**

The Modified ADIME Note was adapted from Standardized Form 600: Chronological Record of Medical Care and the Nutrition Care Process note writing style [27–29]. ADIME stands for Assessment, Diagnosis, Intervention, Monitoring, and Evaluation – a five step process for examining the nutrition status of a patient. In the absence of an EMR, this reporting format prioritizes the assessment, diagnosis, and intervention components of ADIME, and enhances medical documentation efficiency.

### **Appendix 3. Fillable form of the Diet Roster (section 3.5)**

The Diet Roster is designed to quickly identify patients' diet orders, food allergies, and oral nutrition supplement requirements during meal delivery. The roster should be completed for every patient ward or floor by the assigned NDTR. This form should be reviewed and updated regularly as patients are admitted and discharged.

### **Appendix 4. Fillable Nutrition Consultation form (section 4.2)**

The Nutrition Consultation Form is designed to streamline requests from the patient's primary care manager or nursing team for nutrition consultation by a clinical RD. This consultation is designed to be conducted with limited contact time (<5 minutes), performed at a distance (to accommodate medical personnel safety), and integrate assessments, recommendations, and educational needs within the same form.

### **Appendix 5. Fillable Diet Order Change and Supplement Request form (section 4.3)**

The Diet Order Change and Supplement Request Form is designed to streamline changes in diet orders and/or oral nutrition supplements requested by the patient's primary care manager. This is of particular importance if a field hospital lacks an EMR for recording patient nutrition and medical status. Furthermore, such a form can ensure that therapeutic meals reconcile with medical prognoses and treatments.

### **Appendix 6. Fillable form of the Food Temperature Log (section 4.4)**

The Food Temperature Log is designed to monitor and record food temperatures to ensure food is safe when stored, prepared, and served. This is of particular importance when meal preparation occurs at an off-site facility and must be transported to the field hospital for before each meal delivery.



| Nutrition Screening Form                                                                  |  |                                                                               |                                      |                                |  |
|-------------------------------------------------------------------------------------------|--|-------------------------------------------------------------------------------|--------------------------------------|--------------------------------|--|
| <i>Patient Name</i><br><i>(Last Name, First Name Middle Initial)</i>                      |  | <i>Date</i>                                                                   |                                      |                                |  |
|                                                                                           |  | <i>eFIND #</i>                                                                |                                      |                                |  |
| <i>Pod #</i>                                                                              |  | <i>Room #</i>                                                                 |                                      |                                |  |
| <b>Appetite History</b><br><b>(mark 'X' where applies)</b>                                |  | <b>Weight Loss History</b><br><b>(mark 'X' where applies)</b>                 |                                      |                                |  |
| <i>Good (75-100% of meals)</i>                                                            |  | <b>Recent weight loss?</b>                                                    |                                      | <b>Reason for weight loss?</b> |  |
| <i>Fair (50-75% of meals)</i>                                                             |  | <i>Yes</i>                                                                    |                                      | <i>Intentional</i>             |  |
| <i>Poor (&lt;50% of meals)</i>                                                            |  | <i>No</i>                                                                     |                                      | <i>Unintentional</i>           |  |
| <b>Chewing/Swallowing Difficulties?</b><br><b>(mark 'X' where applies)</b>                |  | <b>Cultural/Religious Food Preferences</b><br><b>(mark 'X' where applies)</b> |                                      |                                |  |
| <i>Yes</i>                                                                                |  | <i>Vegan</i>                                                                  |                                      | <i>No Pork</i>                 |  |
|                                                                                           |  | <i>Vegetarian</i>                                                             |                                      | <i>Kosher</i>                  |  |
| <i>No</i>                                                                                 |  | <i>Other</i>                                                                  |                                      | <i>None</i>                    |  |
| <b>Describe 'Other' Cultural or Religious Food Preferences</b>                            |  |                                                                               |                                      |                                |  |
| <b>Food Allergies</b><br><b>(mark 'X' where applies)</b>                                  |  |                                                                               |                                      |                                |  |
| <i>Gluten/Wheat</i>                                                                       |  | <i>Fish/Shellfish</i>                                                         |                                      | <i>Peanut/Tree Nut</i>         |  |
| <i>Lactose Intolerant</i>                                                                 |  | <i>Other</i>                                                                  |                                      | <i>NKFA</i>                    |  |
| <b>Describe 'Other' Food Allergies If Applicable</b>                                      |  |                                                                               |                                      |                                |  |
| <b>*** For Nutrition Operations Personnel Only ***</b><br><b>(mark 'X' where applies)</b> |  |                                                                               |                                      |                                |  |
| <i>Did patient report Fair or Poor 'Appetite History'?</i>                                |  |                                                                               | <i>Yes</i>                           |                                |  |
|                                                                                           |  |                                                                               | <i>No</i>                            |                                |  |
| <i>Did patient report Recent and Unintentional 'Weight Loss History'?</i>                 |  |                                                                               | <i>Yes</i>                           |                                |  |
|                                                                                           |  |                                                                               | <i>No</i>                            |                                |  |
| <b>If patient answered 'Yes' to both questions above, refer patient to RD.</b>            |  |                                                                               |                                      |                                |  |
| <b>Name of NDTR providing screening</b>                                                   |  |                                                                               | <b>Name of patient's assigned RD</b> |                                |  |
|                                                                                           |  |                                                                               |                                      |                                |  |

| Modified ADIME Note                                                       |            |  |                                                 |  |
|---------------------------------------------------------------------------|------------|--|-------------------------------------------------|--|
| <i>Patient Name</i><br><i>(Last Name, First Name Middle Initial)</i>      |            |  | <i>Date</i>                                     |  |
|                                                                           |            |  | <i>eFIND #</i>                                  |  |
| <i>POD #</i>                                                              |            |  | <i>Room #</i>                                   |  |
| Anthropometric Measurements                                               |            |  |                                                 |  |
| <i>Age (yrs.)</i>                                                         |            |  | <i>Gender</i>                                   |  |
| <i>Height (in.)</i>                                                       |            |  | <i>Weight (lbs.)</i>                            |  |
| <i>Ideal Body Weight (lbs.)</i>                                           |            |  | <i>% Ideal Body Weight (%)</i>                  |  |
| Laboratory Test Results                                                   |            |  |                                                 |  |
| <i>Na (mEq/L)</i>                                                         |            |  | <i>K (mEq/L)</i>                                |  |
| <i>Cl (ng/mL)</i>                                                         |            |  | <i>Glucose (mg/dL)</i>                          |  |
| <i>BUN (mg/dL)</i>                                                        |            |  | <i>Creatinine (mg/dL)</i>                       |  |
| <i>Other Labs</i><br><i>(list any others that apply and their values)</i> |            |  |                                                 |  |
| <i>Pertinent Medications</i>                                              |            |  |                                                 |  |
| <i>Propofol</i><br><i>(mark 'X' where applies)</i>                        | <i>Yes</i> |  | <i>Propofol Rate:</i><br><i>(if applicable)</i> |  |
|                                                                           | <i>No</i>  |  |                                                 |  |
| Estimated Nutritional Needs                                               |            |  |                                                 |  |
| <i>Estimated Energy Needs</i>                                             |            |  |                                                 |  |
| <i>Estimated Protein Needs</i>                                            |            |  |                                                 |  |
| <i>Estimated Fluid Needs</i>                                              |            |  |                                                 |  |

| Nutrition Assessment                                |                                          |
|-----------------------------------------------------|------------------------------------------|
| <i>Current Nutrient Intake</i>                      |                                          |
| <i>Nutrition Focused<br/>Physical Exam Findings</i> |                                          |
| Nutrition Diagnosis                                 |                                          |
| <i>Nutrition Diagnosis</i>                          |                                          |
| Nutrition Recommendations                           |                                          |
| <i>Nutrition Recommendations</i>                    |                                          |
| Follow Up Date                                      | RD Name, Signature & Contact Information |
|                                                     |                                          |

| Diet Roster                                                                                                                                             |                 |                                                                      |               |                               |                       |                                   |                       |   |   |
|---------------------------------------------------------------------------------------------------------------------------------------------------------|-----------------|----------------------------------------------------------------------|---------------|-------------------------------|-----------------------|-----------------------------------|-----------------------|---|---|
| Date                                                                                                                                                    |                 |                                                                      |               | Pod #                         |                       |                                   |                       |   |   |
| <i>Line</i>                                                                                                                                             | <i>Bed/Room</i> | <i>Patient Name</i><br><i>(Last Name, First Name Middle Initial)</i> | <i>eFIND#</i> | <i>Diet Order</i>             | <i>Food Allergies</i> | <i>Oral Nutrition Supplements</i> | <i>Meal Delivered</i> |   |   |
| 1                                                                                                                                                       |                 |                                                                      |               |                               |                       |                                   | B                     | L | D |
| 2                                                                                                                                                       |                 |                                                                      |               |                               |                       |                                   | B                     | L | D |
| 3                                                                                                                                                       |                 |                                                                      |               |                               |                       |                                   | B                     | L | D |
| 4                                                                                                                                                       |                 |                                                                      |               |                               |                       |                                   | B                     | L | D |
| 5                                                                                                                                                       |                 |                                                                      |               |                               |                       |                                   | B                     | L | D |
| 6                                                                                                                                                       |                 |                                                                      |               |                               |                       |                                   | B                     | L | D |
| 7                                                                                                                                                       |                 |                                                                      |               |                               |                       |                                   | B                     | L | D |
| 8                                                                                                                                                       |                 |                                                                      |               |                               |                       |                                   | B                     | L | D |
| 9                                                                                                                                                       |                 |                                                                      |               |                               |                       |                                   | B                     | L | D |
| 10                                                                                                                                                      |                 |                                                                      |               |                               |                       |                                   | B                     | L | D |
| 11                                                                                                                                                      |                 |                                                                      |               |                               |                       |                                   | B                     | L | D |
| 12                                                                                                                                                      |                 |                                                                      |               |                               |                       |                                   | B                     | L | D |
| 13                                                                                                                                                      |                 |                                                                      |               |                               |                       |                                   | B                     | L | D |
| 14                                                                                                                                                      |                 |                                                                      |               |                               |                       |                                   | B                     | L | D |
| 15                                                                                                                                                      |                 |                                                                      |               |                               |                       |                                   | B                     | L | D |
| Provide this form to the food service dietitian at the end of meal delivery. Discuss changes to ward roster, barriers to delivering patient meals, etc. |                 |                                                                      |               | Name of NDTR assigned to Ward |                       |                                   |                       |   |   |
|                                                                                                                                                         |                 |                                                                      |               |                               |                       |                                   |                       |   |   |

| Nutrition Consultation Form                                                                                                                                 |  |                                                                                      |  |
|-------------------------------------------------------------------------------------------------------------------------------------------------------------|--|--------------------------------------------------------------------------------------|--|
| <i>Requesting PCM</i><br><i>(Last Name, First Name Middle Initial)</i>                                                                                      |  | <i>Requesting PCM</i><br><i>Contact Information</i><br><i>(pager or cell number)</i> |  |
| Patient Information                                                                                                                                         |  |                                                                                      |  |
| <i>Patient Name</i><br><i>(Last Name, First Name Middle Initial)</i>                                                                                        |  | <i>Date</i>                                                                          |  |
|                                                                                                                                                             |  | <i>eFIND #</i>                                                                       |  |
| <i>POD #</i>                                                                                                                                                |  | <i>Room #</i>                                                                        |  |
| Patient Nutrition Status                                                                                                                                    |  |                                                                                      |  |
| Is this consultation regarding patient's nutrient intake, including concerns for malnutrition, chewing/swallowing, etc.?<br><i>(mark 'X' where applies)</i> |  | Yes                                                                                  |  |
|                                                                                                                                                             |  | No                                                                                   |  |
| <i>If 'Yes,' describe.</i>                                                                                                                                  |  |                                                                                      |  |
| Patient Nutrition Recommendations                                                                                                                           |  |                                                                                      |  |
| Is this consultation regarding nutrition support recommendations?<br><i>(mark 'X' where applies)</i>                                                        |  | Yes                                                                                  |  |
|                                                                                                                                                             |  | No                                                                                   |  |
| <i>If 'Yes,' describe.</i>                                                                                                                                  |  |                                                                                      |  |
| Patient Nutrition Education Recommendations                                                                                                                 |  |                                                                                      |  |
| Is this consultation for nutrition education?<br><i>(mark 'X' where applies)</i>                                                                            |  | Yes                                                                                  |  |
|                                                                                                                                                             |  | No                                                                                   |  |
| <i>If 'Yes,' describe patient's nutrition education needs</i>                                                                                               |  |                                                                                      |  |
| *** For Nutrition Operations Personnel Only ***                                                                                                             |  |                                                                                      |  |
| <i>Name of clinical RD assigned to address this nutrition consultation</i>                                                                                  |  |                                                                                      |  |

| Diet Order Change and Supplement Request Form                                         |  |                                                                            |     |           |  |
|---------------------------------------------------------------------------------------|--|----------------------------------------------------------------------------|-----|-----------|--|
| <i>Patient Name</i><br>(Last Name, First Name Middle Initial)                         |  | Date                                                                       |     |           |  |
|                                                                                       |  | eFIND #                                                                    |     |           |  |
| POD #                                                                                 |  | Room #                                                                     |     |           |  |
| <b>Select the New Diet Order for Patient</b><br>(mark 'X' where applies)              |  |                                                                            |     |           |  |
| Regular/Consistent Carb/Heart Healthy/Low Sodium                                      |  | National Dysphagia Diet (Ground)                                           |     |           |  |
| Renal                                                                                 |  | Puree                                                                      |     |           |  |
| Kosher                                                                                |  | Full Liquid                                                                |     |           |  |
| Dairy-Free                                                                            |  | Clear Liquid                                                               |     |           |  |
| <b>Select a Nutrition Supplement</b><br>(mark 'X' where applies)                      |  | <b>Frequency/Timing of Supplement Delivery</b><br>(mark 'X' where applies) |     |           |  |
| Ensure Plus                                                                           |  | 1x per day                                                                 |     | Breakfast |  |
| Glucerna                                                                              |  | 2x per day                                                                 |     | Lunch     |  |
| Nepro                                                                                 |  | 3x per day                                                                 |     | Dinner    |  |
| <b>*** For Nutrition Operations Personnel Only ***</b><br>(mark 'X' where applies)    |  |                                                                            |     |           |  |
| <i>Has the 'Patient Census and Diet Order Tracker' been updated?</i>                  |  |                                                                            | Yes |           |  |
|                                                                                       |  |                                                                            | No  |           |  |
| <b>Name of food service RD confirming the 'Patient Census and Diet Order Tracker'</b> |  |                                                                            |     |           |  |

| Patient Food Temperature Log |                  |                  |                            |                          |                                               |
|------------------------------|------------------|------------------|----------------------------|--------------------------|-----------------------------------------------|
| Date                         |                  |                  | Pod #                      |                          |                                               |
| Breakfast Meal Delivery      |                  |                  |                            |                          |                                               |
| <i>Time</i>                  | <i>Meal Type</i> | <i>Food Item</i> | <i>Measured Temp. (°F)</i> | <i>Corrective Action</i> | <i>Initials of Person Recording the Temp.</i> |
|                              |                  |                  |                            |                          |                                               |
|                              |                  |                  |                            |                          |                                               |
|                              |                  |                  |                            |                          |                                               |
|                              |                  |                  |                            |                          |                                               |
| Lunch Meal Delivery          |                  |                  |                            |                          |                                               |
|                              |                  |                  |                            |                          |                                               |
|                              |                  |                  |                            |                          |                                               |
|                              |                  |                  |                            |                          |                                               |
|                              |                  |                  |                            |                          |                                               |
| Breakfast Meal Delivery      |                  |                  |                            |                          |                                               |
|                              |                  |                  |                            |                          |                                               |
|                              |                  |                  |                            |                          |                                               |
|                              |                  |                  |                            |                          |                                               |
|                              |                  |                  |                            |                          |                                               |

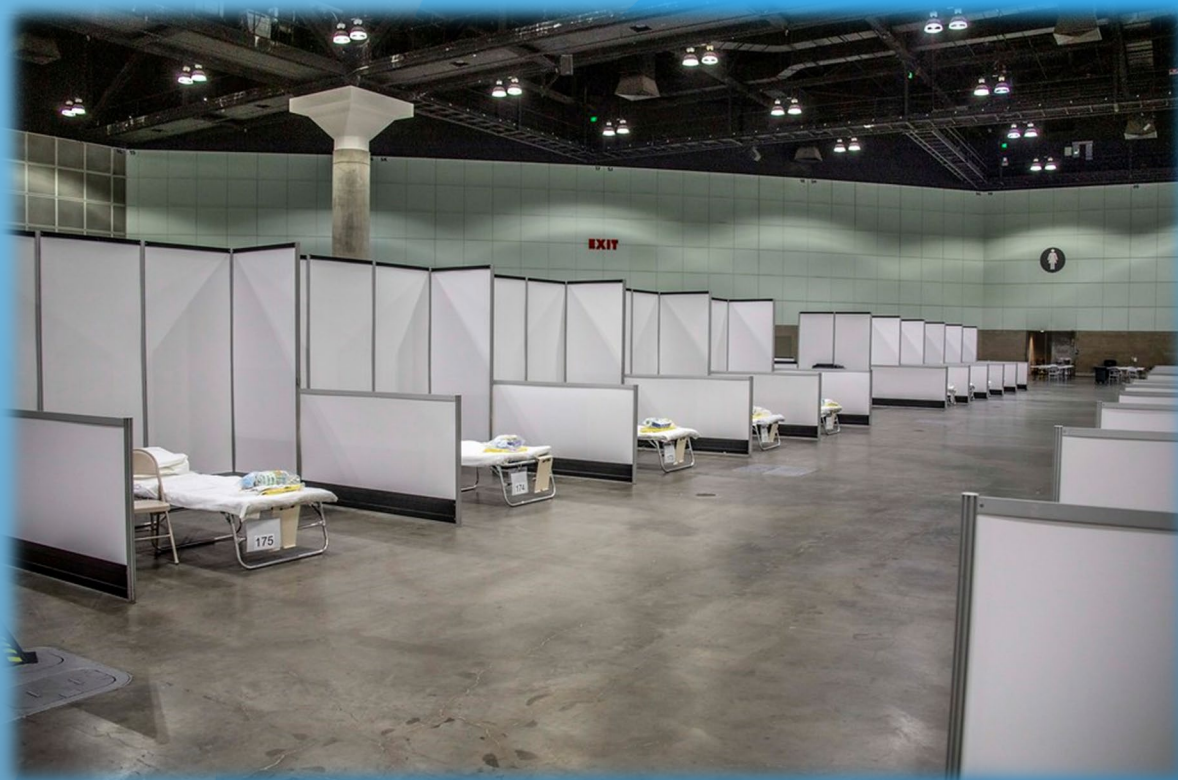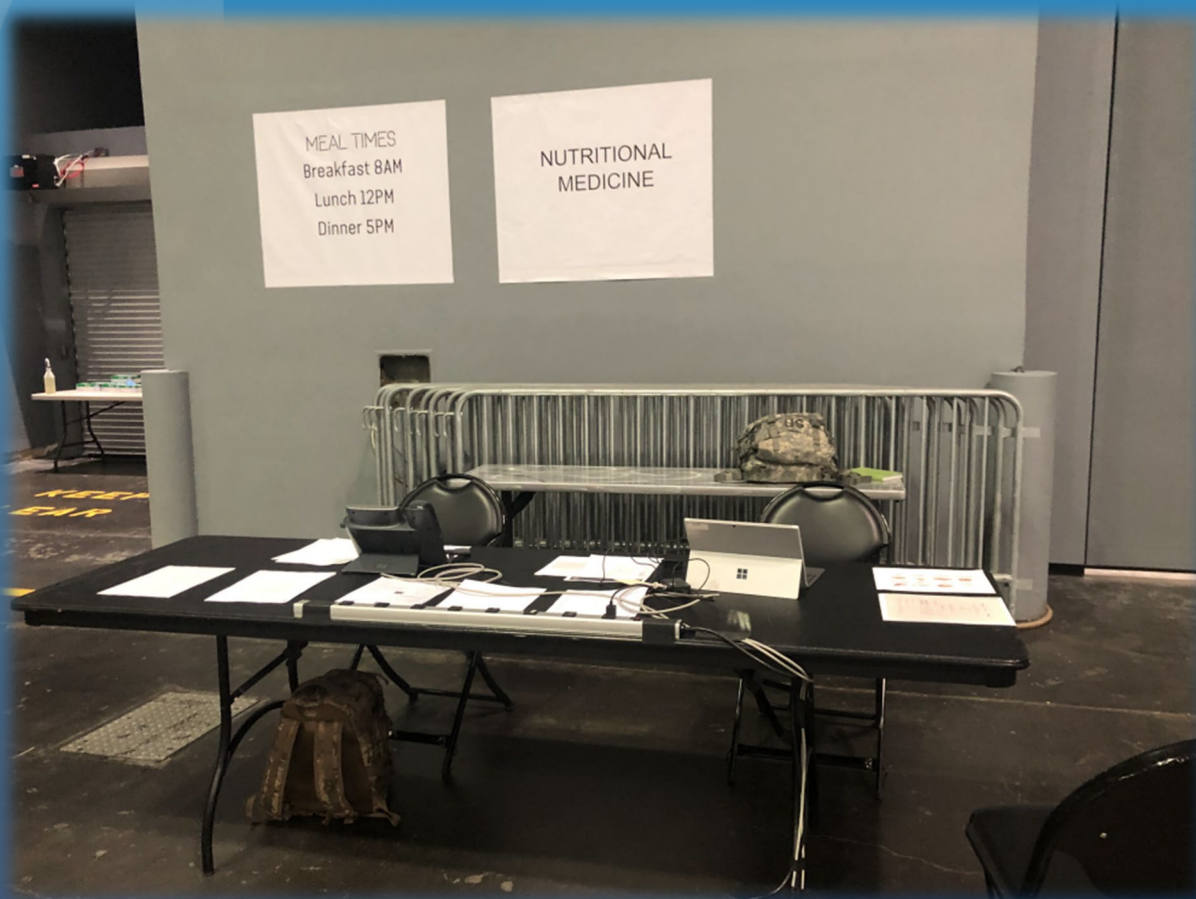

Supplement: s1 [file s1]
